# Supplementary material for: Gut microbiota composition and arterial stiffness measured by pulse wave velocity: case–control study protocol (MIVAS study)
Source: PubMed Central journal article supplement — BMJ Open. 2021 Feb 11;11(2):e038933. doi: 10.1136/bmjopen-2020-038933 (PMC7880115; doi:10.1136/bmjopen-2020-038933), 2021-02-11
Supplement: bmjopen-2020-038933.draft_revisions.pdf [file bmjopen-2020-038933.draft_revisions.pdf]

# BMJ Open

BMJ Open is committed to open peer review. As part of this commitment we make the peer review history of every article we publish publicly available.

When an article is published we post the peer reviewers' comments and the authors' responses online. We also post the versions of the paper that were used during peer review. These are the versions that the peer review comments apply to.

The versions of the paper that follow are the versions that were submitted during the peer review process. They are not the versions of record or the final published versions. They should not be cited or distributed as the published version of this manuscript.

BMJ Open is an open access journal and the full, final, typeset and author-corrected version of record of the manuscript is available on our site with no access controls, subscription charges or pay-per-view fees (<http://bmjopen.bmj.com>).

If you have any questions on BMJ Open's open peer review process please email [info.bmjopen@bmj.com](mailto:info.bmjopen@bmj.com)

# BMJ Open

## Gut microbiota composition and arterial stiffness measured by pulse wave velocity. Case-control study protocol. (MIVAS study)

|                               |                                                                                                                                                                                                                                                                                                                                                                                                                                                                                                                                                                                                                                                                                                                                                                                                                                                                                                                                                                                                                                                                                                                                                                                                                                                                                                                                                                                                                                                                                                                                                                                                                                                                                                                                                                                                                                                                                                                                                                                                                                                                                                                                                                                                                                                                                                                                                                                                                                                                                               |
|-------------------------------|-----------------------------------------------------------------------------------------------------------------------------------------------------------------------------------------------------------------------------------------------------------------------------------------------------------------------------------------------------------------------------------------------------------------------------------------------------------------------------------------------------------------------------------------------------------------------------------------------------------------------------------------------------------------------------------------------------------------------------------------------------------------------------------------------------------------------------------------------------------------------------------------------------------------------------------------------------------------------------------------------------------------------------------------------------------------------------------------------------------------------------------------------------------------------------------------------------------------------------------------------------------------------------------------------------------------------------------------------------------------------------------------------------------------------------------------------------------------------------------------------------------------------------------------------------------------------------------------------------------------------------------------------------------------------------------------------------------------------------------------------------------------------------------------------------------------------------------------------------------------------------------------------------------------------------------------------------------------------------------------------------------------------------------------------------------------------------------------------------------------------------------------------------------------------------------------------------------------------------------------------------------------------------------------------------------------------------------------------------------------------------------------------------------------------------------------------------------------------------------------------|
| Journal:                      | <i>BMJ Open</i>                                                                                                                                                                                                                                                                                                                                                                                                                                                                                                                                                                                                                                                                                                                                                                                                                                                                                                                                                                                                                                                                                                                                                                                                                                                                                                                                                                                                                                                                                                                                                                                                                                                                                                                                                                                                                                                                                                                                                                                                                                                                                                                                                                                                                                                                                                                                                                                                                                                                               |
| Manuscript ID                 | bmjopen-2020-038933                                                                                                                                                                                                                                                                                                                                                                                                                                                                                                                                                                                                                                                                                                                                                                                                                                                                                                                                                                                                                                                                                                                                                                                                                                                                                                                                                                                                                                                                                                                                                                                                                                                                                                                                                                                                                                                                                                                                                                                                                                                                                                                                                                                                                                                                                                                                                                                                                                                                           |
| Article Type:                 | Protocol                                                                                                                                                                                                                                                                                                                                                                                                                                                                                                                                                                                                                                                                                                                                                                                                                                                                                                                                                                                                                                                                                                                                                                                                                                                                                                                                                                                                                                                                                                                                                                                                                                                                                                                                                                                                                                                                                                                                                                                                                                                                                                                                                                                                                                                                                                                                                                                                                                                                                      |
| Date Submitted by the Author: | 29-Mar-2020                                                                                                                                                                                                                                                                                                                                                                                                                                                                                                                                                                                                                                                                                                                                                                                                                                                                                                                                                                                                                                                                                                                                                                                                                                                                                                                                                                                                                                                                                                                                                                                                                                                                                                                                                                                                                                                                                                                                                                                                                                                                                                                                                                                                                                                                                                                                                                                                                                                                                   |
| Complete List of Authors:     | <p>salvado, rita; Institute of Biomedical Research of Salamanca (IBSAL), Primary Health Care Research Unit of Salamanca (APISAL). Health Service of Castilla y León (SACyL); Beatriz Ângelo Hospital, General Emergency, Medicine Department</p> <p>santos-minguez, sandra; IBMCC Institute of Cancer Molecular and Cellular Biology, CIC Cancer Research Institute (USAL-CSIC), Institute for Biomedical Research of Salamanca (IBSAL), Salamanca, Spain.Department of Medicine, University of Salamanca</p> <p>Agudo-Conde, Cristina; Institute of Biomedical Research of Salamanca (IBSAL), Primary Health Care Research Unit of Salamanca (APISAL). Health Service of Castilla y León (SACyL)</p> <p>Lugones-Sanchez, Cristina; Institute of Biomedical Research of Salamanca (IBSAL), Primary Health Care Research Unit of Salamanca (APISAL). Health Service of Castilla y León (SACyL)</p> <p>Cabo-Laso, Angela; Institute of Biomedical Research of Salamanca (IBSAL), Primary Health Care Research Unit of Salamanca (APISAL). Health Service of Castilla y León (SACyL)</p> <p>M<sup>a</sup> Hernandez-Sanchez, Jesus; IBMCC Institute of Cancer Molecular and Cellular Biology, CIC Cancer Research Institute (USAL-CSIC), Institute for Biomedical Research of Salamanca (IBSAL), Salamanca, Spain.Department of Medicine, University of Salamanca</p> <p>Benito, Rocio; IBMCC Institute of Cancer Molecular and Cellular Biology, CIC Cancer Research Institute (USAL-CSIC), Institute for Biomedical Research of Salamanca (IBSAL), Salamanca, Spain.Department of Medicine, University of Salamanca</p> <p>Rodriguez-Sanchez, Emiliano; Institute of Biomedical Research of Salamanca (IBSAL), Primary Health Care Research Unit of Salamanca (APISAL). Health Service of Castilla y León (SACyL)</p> <p>Gomez-Marcos, Manuel; 1. Institute of Biomedical Research of Salamanca (IBSAL), Primary Health Care Research Unit of Salamanca (APISAL). Health Service of Castilla y León (SACyL); Department of Medicine, University of Salamanca</p> <p>Hernandez-Rivas, Jesus; Department of Medicine, University of Salamanca</p> <p>Guimarães Cunha, Pedro; Life and Health Sciences Research Institute (IICVS). School of Medicine, University of Minho</p> <p>Garcia-Ortiz, Luis; Institute of Biomedical Research of Salamanca (IBSAL), Primary Health Care Research Unit of Salamanca (APISAL). Health Service of Castilla y León (SACyL); Department of Biomedical and</p> |

1  
2  
3  
4  
5  
6  
7  
8  
9  
10  
11  
12  
13  
14  
15  
16  
17  
18  
19  
20  
21  
22  
23  
24  
25  
26  
27  
28  
29  
30  
31  
32  
33  
34  
35  
36  
37  
38  
39  
40  
41  
42  
43  
44  
45  
46  
47  
48  
49  
50  
51  
52  
53  
54  
55  
56  
57  
58  
59  
60

|           |                                                                                                                                                                                    |
|-----------|------------------------------------------------------------------------------------------------------------------------------------------------------------------------------------|
|           | Diagnostic Sciences, University of Salamanca<br>Investigators, MIVAS                                                                                                               |
| Keywords: | Protocols & guidelines < HEALTH SERVICES ADMINISTRATION &<br>MANAGEMENT, Microbiology < NATURAL SCIENCE DISCIPLINES,<br>Vascular medicine < INTERNAL MEDICINE, PREVENTIVE MEDICINE |
|           |                                                                                                                                                                                    |

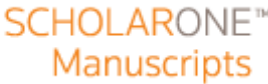

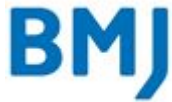

I, the Submitting Author has the right to grant and does grant on behalf of all authors of the Work (as defined in the below author licence), an exclusive licence and/or a non-exclusive licence for contributions from authors who are: i) UK Crown employees; ii) where BMJ has agreed a CC-BY licence shall apply, and/or iii) in accordance with the terms applicable for US Federal Government officers or employees acting as part of their official duties; on a worldwide, perpetual, irrevocable, royalty-free basis to BMJ Publishing Group Ltd ("BMJ") its licensees and where the relevant Journal is co-owned by BMJ to the co-owners of the Journal, to publish the Work in this journal and any other BMJ products and to exploit all rights, as set out in our [licence](#).

The Submitting Author accepts and understands that any supply made under these terms is made by BMJ to the Submitting Author unless you are acting as an employee on behalf of your employer or a postgraduate student of an affiliated institution which is paying any applicable article publishing charge ("APC") for Open Access articles. Where the Submitting Author wishes to make the Work available on an Open Access basis (and intends to pay the relevant APC), the terms of reuse of such Open Access shall be governed by a Creative Commons licence – details of these licences and which [Creative Commons](#) licence will apply to this Work are set out in our licence referred to above.

Other than as permitted in any relevant BMJ Author's Self Archiving Policies, I confirm this Work has not been accepted for publication elsewhere, is not being considered for publication elsewhere and does not duplicate material already published. I confirm all authors consent to publication of this Work and authorise the granting of this licence.

BMJ Open

**Title: Gut microbiota composition and arterial stiffness measured by pulse wave velocity. Case-control study protocol. (MIVAS study)****Short title: Gut microbiota and arterial stiffness**

Rita Salvado<sup>1,2(#)</sup>, Sandra Santos-Minguez<sup>3</sup>, Cristina Agudo-Conde<sup>1</sup>, Cristina Lugones-Sanchez<sup>1</sup>, Angela de Cabo Laso<sup>1</sup>, Jesus M<sup>a</sup> Hernandez-Sanchez<sup>3</sup>, Rocio Benito<sup>3</sup> Emiliano Rodriguez-Sanchez<sup>1,4</sup>, Manuel A Gomez-Marcos<sup>1,4</sup>, Jesus M<sup>a</sup> Hernandez-Rivas<sup>3,4,5</sup>, Pedro Guimarães-Cunha<sup>6(\*)</sup>, Luis García-Ortiz<sup>1,7(\*)</sup>, on behalf MIVAS investigators<sup>8</sup>.

(\*) Both authors equally contributed as senior authors in the study.

1. Institute of Biomedical Research of Salamanca (IBSAL), Primary Health Care Research Unit of Salamanca (APISAL). Health Service of Castilla y León (SACyL), Salamanca, Spain.
2. General Emergency, Medicine Department. Beatriz Ângelo Hospital, Loures, Portugal
3. IBMCC Institute of Cancer Molecular and Cellular Biology, CIC Cancer Research Institute (USAL-CSIC), Institute for Biomedical Research of Salamanca (IBSAL), Salamanca, Spain. Department of Medicine, University of Salamanca, Salamanca, Spain.
4. Department of Medicine, University of Salamanca, Salamanca, Spain.
5. Hematology Department, University Hospital of Salamanca, Institute for Biomedical Research of Salamanca (IBSAL), Salamanca, Spain.
6. Life and Health Sciences Research Institute (IICVS). School of Medicine, University of Minho. Portugal.
7. Department of Biomedical and Diagnostic Sciences, University of Salamanca, Salamanca, Spain.
8. Iberian Network on Arterial Structure, Central Hemodynamics and Neurocognition.

**#Corresponding author:**

Rita Salvado Martins

Unidad de Investigación de Atención Primaria de Salamanca (APISAL)

37005 Salamanca. Spain

Tel: +34 923 291199. Ext 54750

E-mail: [ritasalvado@usal.es](mailto:ritasalvado@usal.es)**E-mail:**RS: [ritasalvado@usal.es](mailto:ritasalvado@usal.es)SSM: [ssantosminguez@gmail.com](mailto:ssantosminguez@gmail.com)CAC: [cagudoconde@yahoo.es](mailto:cagudoconde@yahoo.es)CLS: [crislugsa@gmail.com](mailto:crislugsa@gmail.com)ACL: [angeladecabo@yahoo.es](mailto:angeladecabo@yahoo.es)JMHS: [jesus807@gmail.com](mailto:jesus807@gmail.com)RB: [beniroc@usal.es](mailto:beniroc@usal.es)ERS: [emiliano@usal.es](mailto:emiliano@usal.es)MGM: [magomez@usal.es](mailto:magomez@usal.es)JMHR: [jmhr@usal.es](mailto:jmhr@usal.es)PGC: [pedrocunha@med.uminho.pt](mailto:pedrocunha@med.uminho.pt)LGO: [lgarciao@usal.es](mailto:lgarciao@usal.es)MIVAS Group: [apisal2020@gmail.com](mailto:apisal2020@gmail.com)

## Article Summary

### Introduction

Intestinal microbiota is arising as a new element in the physiopathology of cardiovascular diseases. A healthy microbiota includes a balanced representation of bacteria with health promotion functions (symbiotes). The aim of the study is to analyze the relationship between intestinal microbiota composition and arterial stiffness, measured by carotid-femoral pulse wave velocity (cf-PWV).

### Methods and analysis

An observational case-control study will be developed. Cases will be defined by a cf-PWV > 10 m/s. Controls will be selected from the same population as cases. The study will be developed in a Primary Health Care Center. We will select 324 subjects (162 cases and 162 controls), between 45 and 74 years of age. Cases will be selected from a database that combines data from EVA Study (Spain) and Guimarães/Vizela Study (Portugal). Measurements: PWV will be measured using the SphygmoCor® System and gut microbiome composition in faecal samples will be determined by 16S rRNA sequencing. Lifestyle will be assessed by food frequency questionnaire, adherence to the Mediterranean diet, and IPAQ questionnaire. Body composition will be evaluated by bioimpedance; cardio-ankle vascular index and ankle-brachial index will be determined using Vasera® device and carotid intimal median thickness by ultrasonography.

### Strengths and limitations

- Multicentric and multicountry study
- Observational case-control study that evaluates 324 patients between 40 and 74 years.
- Analyses both gut microbiota and arterial stiffness in humans
- 162 cases defined by PWV > 10 m/s determined using the SphygmoCor System, matched with 162 controls using propensity score.
- Analyses the composition of the gut microbiome in faecal samples by 16S rRNA sequencing.

**Keywords:** gut microbiota, arterial stiffness, pulse wave velocity, case-control study, protocol

### Ethics and dissemination

The study has been approved by Committee of ethics of research with medicines of the health area of Salamanca" in 14/12/2018 (cod. 2018-11-136) and the "Ethics committee for health

BMJ Open

1  
2  
3 of Guimaraes” (Portugal) in 15/10/2019 (ref: 67/2019). All study participants will sign an  
4 informed consent form agreeing to participate in the study, in compliance with the  
5 declaration of Helsinki and the WHO standards for observational studies. The results of this  
6 study will allow a better description of gut microbiota in patients with arterial stiffness. At  
7 least 5 publications in first quartile scientific journals are planned.  
8  
9  
10  
11  
12  
13  
14  
15

16 **Trial Registration Number: NCT03900338**

17  
18 <https://clinicaltrials.gov/ct2/show/NCT03900338>  
19

20  
21 03/03/2020, Version 1  
22  
23  
24  
25  
26  
27  
28  
29  
30  
31  
32  
33  
34  
35  
36  
37  
38  
39  
40  
41  
42  
43  
44  
45  
46  
47  
48  
49  
50  
51  
52  
53  
54  
55  
56  
57  
58  
59  
60

## INTRODUCTION

Cardiovascular diseases (CVD) are the leading cause of morbidity and mortality globally.<sup>1</sup> In the latest years, a big effort has been made to improve the identification of individuals at high risk of suffering a cardiovascular event, looking beyond classical risk factors, using biomarkers that reflect early functional or morphological changes, before overt disease manifests, allowing timely treatment of subclinical disease.<sup>2</sup>

Arterial stiffness has been proven to have a good predictive value for CVD,<sup>3</sup> in various populations, with different levels of risk: general population, elderly, patients with type 2 diabetes, hypertension or end stage renal disease.<sup>4</sup> Arterial stiffness reflects the aortic wall damage caused by several cardiovascular risk factors, over a long period of time, signaling the patients in which arterial risk factors were translated to real risk.<sup>5</sup> Carotid to femoral pulse wave velocity (cf-PWV) is the gold standard to measure arterial stiffness.<sup>6</sup> The major determinants of arterial stiffness are age and hypertension but gender and classical cardiovascular risk factors also play an important role.<sup>5</sup> Other factors, as genetic burden, systemic inflammatory diseases and gut microbiota,<sup>7</sup> have also been linked to pulse wave velocity. Gut microbiota composition has also been implicated on the genesis of hypertension,<sup>8</sup> obesity,<sup>9</sup> insulin resistance, metabolic syndrome<sup>9</sup> and type 2 diabetes.<sup>10</sup>

### Gut microbiota definition and function

Gut microbiota is a new player in the pathophysiology of cardiovascular disease. There are 100 trillion bacteria in the human gut, with 3,3 million non-redundant genes, a hundred times the human genome, which gives human microbiome a huge metabolic potential. In adult's gut microbiota, the majority of the microbial populations belong to the bacteria domain, with approximately 90% of *Bacteroidetes* and *Firmicutes phyla* and the remaining from *Actinobacteria* and *Proteobacteria phyla*. In addition, *Fusobacteria* and *Verrucomicrobia* can



BMJ Open

1  
2  
3 also be detected.<sup>11</sup>  
4

5  
6 Commensal gut microbiota has two main functions: intervenes in human immunologic  
7  
8 response and contributes to energy harvest from no digestible starches. Gut microbiota  
9  
10 competes with pathogenic microorganisms for nutrients and attachment sites, promotes  
11  
12 epithelial cell proliferation and differentiation, to maintain an intact mucosal surface, and  
13  
14 promotes the development of gut lymphoid tissue.<sup>12</sup> Gut microbiota metabolizes cholesterol,  
15  
16 several vitamins, such as choline, and complex carbohydrates and plant polysaccharides  
17  
18 indigestible for human enzymes producing energy and end products such as short-chain fatty  
19  
20 acids (SCFA).<sup>13</sup>  
21  
22  
23  
24

### 25 **Dysbiosis and cardiovascular disease**

26  
27 The shift from a healthy microbiota toward dysbiosis mean that there is an increase in  
28  
29 pathobionts and is likely to be triggered by environmental factors.<sup>9</sup> Although age and gut's  
30  
31 genetically defined architecture are the most relevant factors influencing gut's microbiome  
32  
33 composition<sup>14</sup>, diet and lifestyle are likely the major causes of inter-individual variation in the  
34  
35 composition of human gut's microbiome. There is evidence that the consumption of artificial  
36  
37 sweeteners,<sup>15</sup> dietary emulsifiers,<sup>16</sup> a high-salt diet<sup>17</sup> and obesity<sup>18</sup> alter the gut microbiota,  
38  
39 reduce microbial diversity and induce inflammation, whereas a diet rich in vegetables has  
40  
41 been linked with a healthy microbial diversity<sup>19 20</sup>. Dysbiosis is characterized by a greater  
42  
43 amount of pro-inflammatory species, that favor metabolic diseases development, caused by  
44  
45 both diet-dependent and independent mechanisms.<sup>9 13</sup>  
46  
47  
48  
49  
50

51  
52 Diet independent mechanisms are mediated by two major receptor families that detect  
53  
54 microbes: Toll-like Receptors (TLRs), which control the extracellular compartment, and Nod-  
55  
56 like Receptors (NLRs), which sense the presence of intracellular microbes.<sup>21</sup> Lifestyle and  
57  
58 dietetic factors, like alcohol and energy-dense Western diets, can increase gut permeability  
59  
60

BMJ Open

1  
2  
3 and subsequent translocation of molecules produced by gut microbiota that can activate  
4  
5 peripheral TLRs and NLR resulting in inflammatory reactions, in the liver, white adipose tissue,  
6  
7 brain, and other organs, and trigger metabolic diseases, such as insulin resistance.<sup>22</sup> This  
8  
9 inflammation favors microbial penetration, which can contribute to the explanation of why  
10  
11 obesity and other metabolic diseases are proinflammatory states.<sup>9 13</sup>  
12  
13

14  
15 Diet dependent mechanisms result from microbial enzymatic activities. Some are beneficial,  
16  
17 like microbial fermentation of polysaccharides, producing SCFA, and bile-acid. Others are  
18  
19 detrimental, such as phosphatidylcholine metabolism by intestinal microorganisms, with  
20  
21 conversion to trimethylamine (TMA), subsequently metabolized to trimethylamine N-oxide  
22  
23 (TMAO), which is associated with cardiovascular disease development and progression.<sup>23-25</sup>  
24  
25

26  
27 Our hypothesis is that patients with arterial stiffness, assessed by carotid femoral pulse wave  
28  
29 velocity, have a different intestinal flora, when compared with healthy controls, ie, subject  
30  
31 free of cardiovascular disease. We also hypothesize that gut microbiota will be different in  
32  
33 subjects with different lifestyles, body composition, as well as with target organ damage and  
34  
35 neurocognition.  
36  
37

38  
39 The main objective of this study will be to analyse the relationship between intestinal  
40  
41 microbiota composition and arterial stiffness, in a cardiovascular disease free population.  
42  
43

44  
45 As secondary objectives we will consider the relationship of gut microbiota with other  
46  
47 measures of vascular structure and function, end organ disease, cognition, cardiovascular risk  
48  
49 factors, body composition and lifestyles. We will also analyse gender differences in intestinal  
50  
51 microbiota composition and its relationship with vascular structure and function.  
52  
53

## 54 **METHODS AND ANALYSIS**

### 55 **Design and setting**

56  
57  
58  
59  
60

BMJ Open

This is an observational, multicentric, case-control study. Cases will be defined by a cf-PWV >10m/s. It will be an international study including patients from two neighbor countries: Portugal, through the Life and Health Sciences Research Institute, Minho University (Braga) and Spain, through the Primary Care Research Unit of Salamanca (APISAL) belonging to the Biomedical Research Institute of Salamanca (IBSAL) and Cancer Research Institute of Salamanca (CIC) that will also perform gut microbiota analysis.

### STUDY POPULATION

We will select 324 subjects, aged 45 to 74 years, free of cardiovascular disease. We will recruit patients from a database that combines data from EVA study<sup>26</sup> (Spain) and Guimarães/Vizela Study<sup>27</sup> (Portugal), and if necessary, we will incorporate new patients who meet the inclusion criteria to complete the sample (Figure 1). Controls will be selected from the same population as cases. The methodology of these studies was published elsewhere.<sup>26 27</sup>

#### Selection criteria

*Inclusion criteria:* Patients between 45 and 74 years-old, who agree to participate in the study and do not meet any of the exclusion criteria.

*Exclusion criteria:* history of CVD (ischemic heart disease or stroke, peripheral arterial disease or heart failure), diabetes mellitus, renal failure in terminal stages (glomerular filtration rate below 30%), chronic inflammatory diseases, inflammatory bowel disease, body mass index >40kg/m<sup>2</sup>, oncologic disease diagnosed in the last 5 years and/or under treatment, terminal conditions, antibiotic use within the last 15 days and those who refuse to sign the informed consent.

#### Sample size

The sample size was estimated to detect a minimum odds ratio of 2 in the study factor (microbiota dysbiosis), considering vascular stiffness (cf-PWV >10m/sec) as a dependent

BMJ Open

1  
2  
3 variable and accepting an  $\alpha$  risk of 0.05 and a  $\beta$  risk of 0.20, in a two-sided test, assuming a  
4  
5 rate of losses due to technical difficulties or refusal to participate of 5%, and a rate of exposure  
6  
7 of 0.3%, in the control group. Therefore, it will be necessary to include 324 subjects, 162 with  
8  
9 arterial stiffness and 162 controls.  
10  
11

## 12 **VARIABLES AND MEASUREMENT INSTRUMENTS**

13  
14  
15 General and potentially effect-modifying variables such as age, gender, occupation, family  
16  
17 history of CVD, hypertension, dyslipidemia, hypothyroidism and drug use will be documented.  
18  
19

### 20 **Anthropometric measurements**

21  
22  
23 Body weight will be measured twice, using a homologated electronic scale (Seca® 770 medical  
24  
25 scale and measurement systems, Birmingham, UK) after calibration (precision $\pm$ 0.1kg), with  
26  
27 the patient wearing light clothing and barefoot. Body mass index (BMI) will be calculated as  
28  
29 weight (kg) divided by height (m) squared. Waist circumference will be measured using a  
30  
31 flexible graduated measuring tape, with the patient in the standing position, without clothing.  
32  
33  
34 Body composition will be determined by the Inbody 230 monitor (InBody® Co., Ltd. Seoul,  
35  
36 Korea), which gives information of body composition analysis.  
37  
38

39  
40 Office or Clinical Blood Pressure (BP) will involve three measurements of systolic BP (SBP) and  
41  
42 diastolic BP (DBP), using the average of the last two, with a validated OMRON model by  
43  
44 following the recommendations of the European Society of Hypertension (ESH).<sup>28</sup>  
45  
46

### 47 **Habits and lifestyles**

48  
49 **Diet:** Adherence to the Mediterranean diet, will be measured using the validated 14-point  
50  
51 Mediterranean Diet Adherence Screener (MEDAS),<sup>29</sup> developed by the PREDIMED study  
52  
53 group.. Each question will be scored as 0 or 1. Adequate adherence to the Mediterranean diet  
54  
55 will be assumed when the total score is  $\geq$ 9 points.  
56  
57  
58  
59  
60

BMJ Open

1  
2  
3 With the APP developed in the EVIDENT study<sup>30</sup> (registry number 00/2014/2207), food  
4 consumption will be recorded during a usual week.  
5  
6

7  
8 The dietary habits of participants will be assessed using a semi-quantitative 137-item food-  
9 frequency questionnaire (FFQ), previously validated in Spain<sup>31</sup> and Portugal<sup>32</sup>. The FFQ is  
10 based on typical portion sizes that will be multiplied by the consumption frequency for each  
11 food. This estimated frequency refers to the previous year, from the time of the interview,  
12 and is divided into 9 intake frequency categories ranging from never to more than 6  
13 servings/day.  
14  
15

16  
17  
18 **Physical activity:** Two questionnaires will be used to assess physical activity:  
19

20  
21  
22  
23 *International Physical Activity Questionnaire-Short Form (IPAQ-SF)*. The short form (9 items)  
24 categorizes physical activity for the last 7 days in three levels of intensity: (1) intense physical  
25 activity, (2) moderate-intensity activity, (3) light.<sup>33</sup>  
26  
27

28  
29  
30  
31  
32 *Questionnaire hours seated (Marshall)*: Measures the amount of time spent sitting, at work,  
33 in the displacements and at home, during week days and weekend.<sup>34</sup>  
34  
35

36  
37  
38 **Tobacco and alcohol consumption:** Standardize questionnaire will be used to asses tobacco  
39 and alcohol use.  
40  
41

#### 42 **Laboratory measurements**

43  
44 Venous blood samples will be taken between 08:00 and 09:00 am, after participants have  
45 fasted and abstained from smoking, alcohol and caffeinated beverages consumption, for 12  
46 hours. Fasting plasma glucose, creatinine, uric acid, liver function and lipids levels will be  
47 measured using standard enzymatic automated methods.. A blood sample of each participant  
48 will be frozen for posterior evaluation of total biliary acids, deoxycholic acid and SCFA  
49 concentration (mg/ml).  
50  
51  
52  
53  
54  
55  
56  
57

#### 58 **Gut microbiota measurements**

59  
60

BMJ Open

1  
2  
3 Stool samples will be collected by participants with the OMNIgene GUT (OMR -200) kit that  
4  
5 permits transport and store with preservation of stabilized DNA, at room temperature, for 60  
6  
7 days. This kit allows obtaining high quality DNA suitable for 16S rRNA microbiome profiling  
8  
9 and ensures microbiota profiles accurately represent the in vivo state. All specimens will be  
10  
11 sent to the Cancer Research Center in Salamanca.  
12  
13

14  
15 DNA will be extracted using the FastDNA Soil method, according to the manufacturer's  
16  
17 instructions [FastDNA® SPIN Kit for Soil (MP Biomedicals, USA)]. DNA will be extracted from  
18  
19 100-150ul of different feces samples. Each sample will be added to a Lysing Matrix E tube  
20  
21 (each tube contains 1.4mm ceramic spheres, 0.1mm silica spheres and one 4mm glass beads)  
22  
23 and mixed with different buffers to solubilize membrane proteins, extra-cellular proteins and  
24  
25 contaminants in the samples. Afterwards, the sample mix will be homogenize in the Cell  
26  
27 disrupter Thermo Savant Fastprep FP120 at 6m/second for 40 seconds. This allows a  
28  
29 mechanical disruption of cell walls of the present organisms. DNA will then be eluted with  
30  
31 50ul of DNase/Pyrogen-Free Water (DES), after successive washing steps through the silica  
32  
33 Binding Matrix where the purified nucleic acids were retained. Finally, purified DNA will be  
34  
35 measured in the Nanodrop, to check quality and quantity.  
36  
37

38  
39 DNA yield ( $\text{ng } \mu\text{l}^{-1}$ ) will be quantified spectrophotometrically with a NanoDrop 2000c  
40  
41 Spectrophotometer (Thermo Fisher Scientific, USA). It will also be quantified fluorometrically  
42  
43 in a TapeStation 2200, using Genomic DNA ScreenTapes (Agilent, USA) and in a Qubit 4.0  
44  
45 fluorometer (Invitrogen, USA). DNA extraction efficiency will be calculated as the total  
46  
47 amount of DNA extracted per biomass ( $\mu\text{g g wet wt}^{-1}$ ). NanoDrop will also be used to  
48  
49 estimate the purity of the extracted DNA. Low absorption ratios at 260/280nm ( $<1.7$ ) will be  
50  
51 used as an indicator of protein impurities, and low absorption ratios at 260/230nm ( $<2$ ) will  
52  
53 be used as an indicator of contamination from polysaccharides. The TapeStation system  
54  
55  
56  
57  
58  
59  
60

BMJ Open

1  
2  
3 performs electrophoresis in so-called ScreenTapes and outputs images of DNA integrity as  
4  
5 well as a DNA Integrity Number (DIN) based on the sizes of the isolated DNA. The DIN ranges  
6  
7 from 1 to 10, and a high DIN indicates large DNA fragments, whereas a low DIN indicates more  
8  
9 fragmented DNA. DIN determines the fragmentation of a genomic DNA sample by assessing  
10  
11 the distribution of signal across the size range using a proprietary algorithm.  
12  
13  
14

### 15 **Amplicon and Illumina sequencing of bacterial 16S rRNA genes**

16  
17 Amplicon sequences of bacterial 16S rRNA genes, which target v3-v4 regions, will be obtained  
18  
19 using Illumina predesigned primer pair, as previously described<sup>35</sup>:  
20  
21

22  
23 *S-D-Bact-0341-b-S-17*, 5'-CCTACGGGNGGCWGCAG-3' and *S-D-Bact-0785-a-A-21*, 5'-  
24  
25 GACTACHVGGGTATCTAATCC-3', with a length of 465 bp.  
26  
27

28 Since v5-v6 regions have also been considered the most functional regions, together with  
29  
30 v4<sup>36</sup>, and two of the most relevant regions for phylogenetic classification, we will also analyze  
31  
32 these regions. The v5-v6 primers were obtained from<sup>37</sup> being the sequences: V5F\_Nextera 5'-  
33  
34 RGGATTAGATACCC-3' and V6R\_Nextera 5'- CGACRRCCATGCANACCT-3', with a length of  
35  
36 281bp. Both primers pair, targeting the variable regions v3-v4 and v5-v6 are equipped with  
37  
38 Illumina adapter overhang nucleotide sequences:  
39  
40

- 41  
42 • *Forward overhang: 5' TCGTCGGCAGCGTCAGATGTGTATAAGAGACAG-[locus-specific sequence]*
- 43  
44 • *Reverse overhang: 5' GTCTCGTGGGCTCGGAGATGTGTATAAGAGACAG-[locus-specific sequence].*
- 45  
46

47 The resulting amplicons will be purified using Agencourt AMPure XP (Beckman Coulter) as  
48  
49 recommended by the manufacturer. They will then be amplified in a second PCR where the  
50  
51 indexes will be added. The index is unique for each sample of each patient. Once the samples  
52  
53 are indexed and identified, the last purification using the Agencourt AMPure XP kit will be  
54  
55 performed. At this point, amplicon libraries of each sample are generated. These libraries  
56  
57 should be quantified in the Qubit, normalized and pooled in equimolar amounts. The pooled  
58  
59  
60

BMJ Open

1  
2  
3 samples will be sequenced, using an Illumina MiSeq with 2 × 300bp v3 chemistry, to obtain  
4  
5 high quality scores.  
6

### 8 **Bioinformatics**

9  
10 Raw sequence data will be analyzed using an *in-house* pipeline. This pipeline includes base  
11 pair quality filtering, alignment and comparison to a reference database. Quality passing-filter  
12 readings will be clustered into operational taxonomic units (OTUs). Then, we will compare  
13 control *versus* cases samples. All the microbiome differences will be then interpreted and  
14 classified. Quality control will be carried out on a *per sample* basis, discarding paired-ends  
15 with an overlap of less than 200nt and removing chimeric sequences using de novo chimera  
16 detection in USEARCH.<sup>38</sup>  
17  
18  
19  
20  
21  
22  
23  
24  
25  
26

### 27 **Vascular structure and function**

#### 30 **Carotid-femoral pulse wave velocity (cf-PWV) and Central Augmentation Index (CAIx):**

31  
32 These parameters will be estimated using the SphygmoCor System (AtCor Medical Pty Ltd,  
33 Head Office, West Ryde, Australia). With the patient sitting and resting his/her arm on a rigid  
34 surface, pulse wave analysis will be performed with a sensor in the radial artery, using a  
35 mathematical transformation to estimate the aortic pulse wave. CAIx will be estimated from  
36 aortic wave morphology using the following formula: increase in central pressure×100/pulse  
37 pressure, and it will be adjusted for a heart rate of 75 bpm. Carotid and femoral artery pulse  
38 waves will be analyzed, with the patient in a supine position, using the SphygmoCor System,  
39 estimating the delay, as compared with the ECG wave, and calculating cf-PWV. Distance  
40 measurements will be taken with a measuring tape from the sternal notch to the carotid and  
41 femoral arteries at the sensor location and will be multiplied by 0.8. Subclinical organ damage  
42 will be defined as a cf-PWV>10m/s.<sup>28</sup>  
43  
44  
45  
46  
47  
48  
49  
50  
51  
52  
53  
54  
55  
56  
57  
58  
59  
60



BMJ Open

1  
2  
3 **Cardio-ankle Vascular Index (CAVI), brachial ankle PWV (ba-PWV) and Ankle Brachial Index**

4  
5 **(ABI):** These parameters will be estimated using the Vasera device VS-2000 (Fukuda Denshi  
6  
7 Co., Ltd. Tokyo, Japan). CAVI values will be automatically calculated by substituting the  
8  
9 stiffness parameters in the following equation to detect the vascular elasticity and the cardio  
10  
11 ankle PWV: stiffness parameter  $\beta = 2\rho \times 1 / (P_s - P_d) \times \ln(P_s / P_d) \times PWV^2$ , where  $\rho$  is the blood  
12  
13 density,  $P_s$  and  $P_d$  are SBP and DBP in mmHg, and PWV is measured between the aortic valve  
14  
15 and ankle. The average coefficient of the variation of CAVI is <5%, which is small enough for  
16  
17 clinical use and confirms that CAVI has favorable reproducibility.<sup>39</sup> The ba-PWV will be  
18  
19 estimated using the following equation:  $ba-PWV = ((0.5934 \times \text{height}(\text{cm}) + 14.4724)) / t_{ba}$ , where  
20  
21  $t_{ba}$  is the time the same waves were transmitted to the ankle.<sup>40</sup> For this study, the mean ABI,  
22  
23 CAVI and ba-PWV obtained will be considered. CAVI will be classified as: normal (CAVI < 8),  
24  
25 borderline ( $8 \leq \text{CAVI} < 9$ ) and abnormal (CAVI  $\geq 9$ );  $ba-PWV \geq 17.5$ <sup>41</sup> and  $ABI \leq 0.9$  will be considered  
26  
27 abnormal.<sup>42</sup>

28  
29 **Central and peripheral augmentation index by the wrist-worn device:** Participants will be  
30  
31 examined in a seated position, after 10 minutes of rest with his/her arm supported on a firm  
32  
33 surface, at heart height. The wrist-worn device has been developed by Microsoft Research  
34  
35 (Redmond, Washington, United States) and was recently validated<sup>43</sup>. We will use this device  
36  
37 to make a short recording of the radial pulse wave, from which PAIx and CAIx will be obtained.  
38  
39 PAIx will be calculated as  $(\text{second peak SBP (SBP2)} - \text{DBP}) / (\text{first peak SBP} - \text{DBP}) \times 100$ , to yield  
40  
41 a percentage (%) value. From the estimated morphology of the aortic wave, by mathematical  
42  
43 transformation specific to the wrist-worn device, CAIx will be calculated using the following  
44  
45 formula:  $\text{central augmentation pressure} \times 100 / \text{pulse pressure}$ .

46  
47 **Assessment of vascular structure by Carotid IMT (C-IMT):** Carotid ultrasound will be  
48  
49 performed by investigators trained for this purpose before starting the study, to assess C-IMT.  
50  
51  
52  
53  
54  
55  
56  
57  
58  
59  
60

BMJ Open

1  
2  
3 Measurements will be made of the common carotid after the examination of a 10 mm  
4 longitudinal section at a distance of 1cm from the bifurcation, performing measurements in  
5 the proximal and in the distal wall in the lateral, anterior and posterior projections, following  
6 an axis perpendicular to the artery to discriminate two lines, one for the intima blood  
7 interface and the other for the media-adventitious interface. The measurements will be  
8 obtained with the participant lying down, with the head extended and slightly turned  
9 opposite to the examined carotid artery. Pathologic intima media thickening:  $IMT > 0.9\text{mm}$ ,  
10 or atheromatous plaque diameter greater than 1.5mm, or focal increase of 0.5mm or 50% of  
11 the adjacent GIM.<sup>28</sup>

### 24 **Renal and Cardiac assessment**

25  
26  
27 Kidney damage will be assessed by the estimated glomerular filtration rate using the Chronic  
28 Kidney Disease Epidemiology Collaboration (CKD-EPI)<sup>44</sup> equation and albumin-creatinine  
29 ratio, following the criteria of the ESH<sup>28</sup>. Cardiac examination will be performed using a  
30 electrocardiogram device (ECG). ECG left ventricular hypertrophy will be defined as a  
31 Sokolow-Lyon index  $>3.5\text{mV}$ , or Cornell VDP  $>244\text{mV}\times\text{ms}$ .<sup>28</sup>

### 38 **Cognitive assessment**

39  
40  
41 The **Montreal Cognitive Assessment (MoCA)**, a screening tool of dementia, validated in  
42 Spain<sup>45</sup> and Portugal<sup>46</sup> will be applied. The MoCA was designed as a rapid screening  
43 instrument for mild cognitive dysfunction. It assesses different cognitive domains: attention  
44 and concentration, executive functions, memory, language, visuo-constructional skills,  
45 conceptual thinking, calculations and orientation. Time estimated for MoCA administration is  
46 approximately 10 minutes. The total possible score is 30 points; a score of 26 or above is  
47 considered normal.

BMJ Open

1  
2  
3 Investigators applying the different tests will be blinded to participants clinical data. All  
4  
5 assessments will be carried out within 10 days.  
6  
7

## 8 **STATISTICAL ANALYSIS**

9  
10 Data input will be performed using the REDCap (System Electronic Data Capture),<sup>47</sup> with a  
11  
12 questionnaire previously designed for the project. Normal distribution of variables will be  
13  
14 verified using the Kolmogorov-Smirnov test. Quantitative variables will be displayed as  
15  
16 mean±SD, if normally distributed, or as median (IQR), if asymmetrically distributed, and  
17  
18 qualitative variables will be expressed as frequencies. Analysis of difference of means  
19  
20 between variables of two categories will be carried out using a Student' t-test or a Mann-  
21  
22 Whitney U test, as appropriate, while qualitative variables will be analyzed using a  $\chi^2$  test. To  
23  
24 analyze the relationship between qualitative variables of more than two categories, and  
25  
26 quantitative variables, an analysis of variance and the least significant difference test will be  
27  
28 used in the post hoc tests; a Kruskal-Wallis test will be used in cases where the variables are  
29  
30 not normally distributed. The relationship of quantitative variables to each other will be  
31  
32 tested using Pearson or Spearman correlation, as appropriate. Analysis of covariance  
33  
34 (ANCOVA) will be performed to adjust for the variables that can affect the results as  
35  
36 confounders. Logistic regression will be performed to evaluate the association between the  
37  
38 study factor (gut microbial diversity) and the dependent variable (arterial stiffness asessed by  
39  
40 PWV), adjusted for possible confounding variables (sex, age, BMI, MAP and family  
41  
42 relatedness). A multiple linear regression will also be performed to analyze the relationship  
43  
44 of the study factor (gut microbiota) with the variables that analyze vascular structure and  
45  
46 function quantitatively. This regression will be adjusted for the same confounding variables  
47  
48 as the logistic regression.  
49  
50  
51  
52  
53  
54  
55  
56  
57  
58  
59  
60

BMJ Open

1  
2  
3 Data will be analyzed using the SPSS V.23.0 statistical package (SPSS Inc, Chicago, Illinois,  
4 USA). A value of  $p < 0.05$  will be considered statistically significant. The  
5  
6  
7  
8  
9  
10  
11  
12  
13  
14  
15  
16  
17  
18  
19  
20  
21  
22  
23  
24  
25  
26  
27  
28  
29  
30  
31  
32  
33  
34  
35  
36  
37  
38  
39  
40  
41  
42  
43  
44  
45  
46  
47  
48  
49  
50  
51  
52  
53  
54  
55  
56  
57  
58  
59  
60

statisticians/researchers who perform the different analyses will be blinded to participants clinical data.

### **QUALITY CONTROL**

Different processes will be carried out to guarantee study data quality and thus maximize validity and reliability of measurements and results. For this purpose, field work operation manuals have been prepared. Educational leaflets will be developed to ensure correct stool collection. All of these actions will assure an adequate performance at each procedure. Monthly meetings will be held, with the investigators of both Centers, to analyze the entire process, and annual reports on study progress will be prepared.

### **PROJECT SCHEDULE**

This project will be performed in 3 years. In the first 2 years we will perform sample selection and inclusion and data collection using the previously mentioned questionnaires. During the third year, analysis and dissemination of the results will be held.

### **ETHICS AND DISSEMINATION**

#### **Ethical considerations**

The study was approved by the “Committee of ethics of research with medicines of the health area of Salamanca” in 14/12/2018 (cod. 2018-11-136) and the “Ethics committee for health of Guimaraes” (Portugal) in 15/10/2019 (ref: 67/2019). Participants must provide informed consent, in accordance with the Declaration of Helsinki. Confidentiality of participants data will always be guaranteed, in accordance with the Regulation (EU) 2016/679 of the European Parliament and of the Council of 27 April 2016, on the protection of natural persons with

BMJ Open

1  
2  
3 regard to the processing of personal data and on the free movement of such data, and  
4  
5  
6 repealing Directive 95/46/EC.

7  
8 A SPIRIT checklist is available for this protocol. The clinical trial has been registered at  
9  
10 ClinicalTrials.gov, with the identifier NCT03900338.

### 11 12 13 **Dissemination plan**

14  
15 Data will be available to members of the research group and members of the Iberian Network  
16  
17 on Arterial Structure, Central Hemodynamics and Neurocognition, following the criteria  
18  
19 previously defined by the management team.

20  
21  
22 The research group plans to achieve rapid and widespread dissemination of results to ensure  
23  
24 maximum visibility of this study. To this end, results of the study will be published in open-  
25  
26 access scientific journals with peer review. At least one publication of the main results and  
27  
28 others with the secondary results are planned. This will be complemented by the presentation  
29  
30 of the results of the study at relevant scientific conferences and seminars, of national and  
31  
32 international scope. Also, a doctoral thesis based on this project will be prepared. Appropriate  
33  
34 dissemination will likewise be carried out through social networks and other media.

35  
36  
37 Patients or the public WERE NOT involved in the design, or conduct, or reporting, or  
38  
39 dissemination plans of our research.

### 40 41 42 43 44 **DISCUSSION**

45  
46  
47 In recent years, there has been an increase in attention to gut microbiota richness and  
48  
49 complexity. The detailed evaluation on the biochemical role of gut microbiome unveils its  
50  
51 contribution to local and systemic inflammation and to the development of metabolic  
52  
53 diseases, by both diet dependent and independent mechanisms.<sup>21 23</sup> A relation between  
54  
55 microbiota and arterial stiffness, an early marker of vascular lesion, is expected.<sup>48</sup> A recent  
56  
57 study from London found an inverse association between gut microbiome diversity and  
58  
59  
60

BMJ Open

1  
2  
3 arterial stiffness, in women.<sup>49</sup> Another study, from Moscow, reported a relation between  
4  
5 metabolic dysfunctions, gut microbiota low diversity and increased representation of  
6  
7 opportunistic pathogens.<sup>50</sup>  
8  
9

10 We propose to analyze microbiota in patients with documented arterial stiffness. We believe  
11  
12 that results from this study will provide novel data that will contribute to the understanding  
13  
14 of microbiota role in the development of cardiovascular diseases. That knowledge may help  
15  
16 to develop non-pharmacological approaches and strategies to prevent CVD, through lifestyle  
17  
18 modification.  
19  
20  
21  
22  
23  
24  
25  
26  
27  
28  
29  
30  
31  
32  
33  
34  
35  
36  
37  
38  
39  
40  
41  
42  
43  
44  
45  
46  
47  
48  
49  
50  
51  
52  
53  
54  
55  
56  
57  
58  
59  
60

## Acknowledgments

The authors are grateful to all MIVAS group investigators: Luis García-Ortiz, Pedro Guimarães-Cunha, Rita Salvado, Isabel Vila, Manuel A Gomez-Marcos, Carlos Martínez-Salgado, Jesús M Hernandez-Rivas, Rogelio Gonzalez-Sarmiento, Jesus M<sup>a</sup> Hernandez-Sanchez, Rocio Benito, Sandra Santos-Minguez, Emiliano Rodriguez-Sanchez, Maria C Patino-Alonso, Jose A Maderuelo-Fernandez, José I Recio-Rodríguez, Jesús González-Sánchez, Susana Gonzalez Sanchez, Cristina Agudo-Conde, Cristina Lugones-Sanchez, Rosario Alonso-Domínguez, Carmela Rodriguez-Martín, Ángela de Cabo-Laso, Benigna Sánchez-Salgado, Natalia Sanchez-Aguadero, Sara Mora-Simón, Olaya Tamayo-Morales and M<sup>a</sup> Pilar Martín-Gonzalez on behalf of the Iberian network on arterial structure, central hemodynamics and neurocognition.

**Author Contributions** LGO, PGC and RS contributed to the conception and design of the study. RS and LGO prepared the manuscript of the study protocol. CAC, ACL, MAGM, ERS and JMHS contributed to the development of the study protocol. LGO and JMHR provided assistance with statistical methodology and knowledge. LGO, PCG, JMHR, MAG and ERS provided a critical review of the manuscript. All authors have read and accepted the final version of the protocol.

**Funding** The project has been funded by the Biomedical Research Institute of Salamanca (IBSAL); the Carlos III Health Institute (Spain) through the Network of preventive activities and health promotion (redIAPP, RD16/0007), co-financed with European funds for regional development (FEDER), and the Autonomous Government of Castilla y León (GRS 1820/B/18 and intensification program). They played no role in the study design, analysis, reporting of results, or decision to submit the manuscript for publication.

**Competing interests** None declared.

**Ethics approval** Committee of ethics of research with medicines of the health area of Salamanca (Spain) in 14/12/2018 (cod. 2018-11-136) and the Ethics committee for health of Guimaraes (Portugal) in 15/10/2019 (ref: 67/2019).

## REFERENCES

1. Piepoli MF, Hoes AW, Agewall S, et al. 2016 European Guidelines on cardiovascular disease prevention in clinical practice The Sixth Joint Task Force of the European Society of Cardiology and Other Societies on Cardiovascular Disease Prevention in Clinical Practice (constituted by representative. *Eur Heart J* 2016;37:2315-81. doi: 10.1093/eurheartj/ehw106
2. Vlachopoulos C, Xaplanteris P, Aboyans V, et al. The role of vascular biomarkers for primary and secondary prevention. A position paper from the European Society of Cardiology Working Group on peripheral circulation: Endorsed by the Association for Research into Arterial Structure and Physiology (ARTERY. *Atherosclerosis* 2015;241:507-32. doi: 10.1016/j.atherosclerosis.2015.05.007
3. Vlachopoulos C, Aznaouridis K, Stefanadis C. Prediction of Cardiovascular Events and All-Cause Mortality With Arterial Stiffness. *Journal of the American College of Cardiology* 2010;55:1318-27. doi: 10.1016/j.jacc.2009.10.061
4. Vlachopoulos C, Aznaouridis K, Stefanadis C. Aortic Stiffness for Cardiovascular Risk Prediction. *Journal of the American College of Cardiology* 2014;63:647-49. doi: 10.1016/j.jacc.2013.10.040
5. Laurent S, Marais L, Boutouyrie P. The Noninvasive Assessment of Vascular Aging. *Canadian Journal of Cardiology* 2016;32:669-79. doi: 10.1016/j.cjca.2016.01.039
6. Collaboration RVfAS. Determinants of pulse wave velocity in healthy people and in the presence of cardiovascular risk factors: 'establishing normal and reference values'. *Eur Heart J* 2010;31:2338-50. doi: 10.1093/eurheartj/ehq165
7. Kashtanova D, Tkacheva O, Popenko A, et al. Gut microbiota and vascular biomarkers in patients without clinical cardiovascular diseases. *Artery Research* 2017;18:41-48. doi: 10.1016/j.artres.2017.02.007
8. Marques FZ, Mackay CR, Kaye DM. Beyond gut feelings: how the gut microbiota regulates blood pressure. *Nature Reviews Cardiology* 2017 doi: 10.1038/nrcardio.2017.120
9. Boulangé CL, Neves AL, Chilloux J, et al. Impact of the gut microbiota on inflammation, obesity, and metabolic disease. *Genome Medicine* 2016;8:42. doi: 10.1186/s13073-016-0303-2
10. Blandino G, Inturri R, Lazzara F, et al. Impact of gut microbiota on diabetes mellitus. *Diabetes and Metabolism: Elsevier Masson*, 2016:303-15.
11. Panda S, Guarner F, Manichanh C. Structure and functions of the gut microbiome. *Endocrine, metabolic & immune disorders drug targets* 2014;14:290-9.
12. Tremaroli V, Bäckhed F. Functional interactions between the gut microbiota and host metabolism. *Nature* 2012;489:242-49. doi: 10.1038/nature11552
13. Hall AB, Tolonen AC, Xavier RJ. Human genetic variation and the gut microbiome in disease. *Nature Reviews Genetics* 2017;18:690-99. doi: 10.1038/nrg.2017.63
14. Suez J, Korem T, Zeevi D, et al. Artificial sweeteners induce glucose intolerance by altering the gut microbiota. *Nature* 2014;514:181-6. doi: 10.1038/nature13793
15. Chassaing B, Koren O, Goodrich JK, et al. Dietary emulsifiers impact the mouse gut microbiota promoting colitis and metabolic syndrome. *Nature* 2015;519:92-6. doi: 10.1038/nature14232
16. Schnorr SL, Candela M, Rampelli S, et al. Gut microbiome of the Hadza hunter-gatherers. *Nature Communications* 2014;5:3654. doi: 10.1038/ncomms4654
17. Hung S-C, Yang T-M, Tarng D-C. SP260HIGH SALT DIET ALTERS GUT MICROBIOTA LEADING TO INFLAMMATION AND PROGRESSION OF CKD. *Nephrology Dialysis Transplantation* 2017;32:iii194-iii94. doi: 10.1093/ndt/gfx145.SP260
18. Wu H, Tremaroli V, Bäckhed F. Linking Microbiota to Human Diseases: A Systems Biology Perspective. *Trends in endocrinology and metabolism: TEM* 2015;26:758-70. doi: 10.1016/j.tem.2015.09.011
19. David LA, Maurice CF, Carmody RN, et al. Diet rapidly and reproducibly alters the human gut microbiome. *Nature* 2013;505:559-63. doi: 10.1038/nature12820
20. Wu GD, Chen J, Hoffmann C, et al. Linking Long-Term Dietary Patterns with Gut Microbial Enterotypes. *Science* 2011;334:105-08. doi: 10.1126/science.1208344
21. Yiu JHC, Dorweiler B, Woo CW. Interaction between gut microbiota and toll-like receptor: from immunity to metabolism. *Journal of Molecular Medicine* 2017;95:13-20. doi: 10.1007/s00109-016-1474-4
22. Cox AJ, West NP, Cripps AW. Obesity, inflammation, and the gut microbiota. *The Lancet Diabetes & Endocrinology* 2015;3:207-15. doi: 10.1016/S2213-8587(14)70134-2
23. Qi J, You T, Li J, et al. Circulating trimethylamine N-oxide and the risk of cardiovascular diseases: a systematic review and meta-analysis of 11 prospective cohort studies. *Journal of Cellular and Molecular Medicine* 2017 doi: 10.1111/jcmm.13307



- 1  
2  
3 24. Tang WHW, Wang Z, Levison BS, et al. Intestinal microbial metabolism of phosphatidylcholine and  
4 cardiovascular risk. *The New England journal of medicine* 2013;368:1575-84. doi: 10.1056/NEJMoa1109400
- 5 25. Cho CE, Taesuwan S, Malysheva OV, et al. Trimethylamine- *N*-oxide (TMAO) response to animal  
6 source foods varies among healthy young men and is influenced by their gut microbiota composition: A  
7 randomized controlled trial. *Molecular Nutrition & Food Research* 2017;61:1600324. doi:  
8 10.1002/mnfr.201600324
- 9 26. Gomez-Marcos MA, Martinez-Salgado C, Gonzalez-Sarmiento R, et al. Association between different risk  
10 factors and vascular accelerated ageing (EVA study): study protocol for a cross-sectional, descriptive  
11 observational study. *BMJ Open* 2016;6(6):e011031. doi: 10.1136/bmjopen-2016-011031 [published Online  
12 First: 2016/06/09]
- 13 27. Cunha PG, Cotter J, Oliveira P, et al. The Rationale/Design of the Guimarães/Vizela Study. *Journal of*  
14 *Investigative Medicine* 2014;62:813-20. doi: 10.2310/JIM.0000000000000069
- 15 28. Zanchetti A, Dominiczak A, Coca A, et al. 2018 ESC/ESH Guidelines for the management of arterial  
16 hypertension. *Eur Heart J* 2018;39(33):3021-104. doi: 10.1093/eurheartj/ehy339 %J European Heart Journal
- 17 29. Schroder H, Fito M, Estruch R, et al. A short screener is valid for assessing Mediterranean diet adherence  
18 among older Spanish men and women. *J Nutr* 2011;141(6):1140-5. doi: 10.3945/jn.110.135566 [published  
19 Online First: 2011/04/22]
- 20 30. Recio-Rodriguez JI, Gomez-Marcos MA, Agudo-Conde C, et al. EVIDENT 3 Study: A randomized, controlled  
21 clinical trial to reduce inactivity and caloric intake in sedentary and overweight or obese people using a  
22 smartphone application: Study protocol. *Medicine (Baltimore)* 2018;97(2):e9633. doi:  
23 10.1097/md.0000000000009633 [published Online First: 2018/02/27]
- 24 31. Martin-Moreno JM, Boyle P, Gorgojo L, et al. Development and validation of a food frequency  
25 questionnaire in Spain. *Int J Epidemiol* 1993;22(3):512-9. doi: 10.1093/ije/22.3.512 [published Online First:  
26 1993/06/01]
- 27 32. Pedro Moreira DS, Maria Daniel Vaz de Almeida. Validade relativa de um questionário de frequênc|encia  
28 alimentar através da comparação com um registo alimentar de quatro dias. *Acta Médica Portuguesa*  
29 2003;16(6):412-20. doi: <http://dx.doi.org/10.20344/amp.1218>
- 30 33. Craig CL, Marshall AL, Sjostrom M, et al. International physical activity questionnaire: 12-country reliability  
31 and validity. *Med Sci Sports Exerc* 2003;35(8):1381-95. doi: 10.1249/01.mss.0000078924.61453.fb [published  
32 Online First: 2003/08/06]
- 33 34. Marshall AL, Miller YD, Burton NW, et al. Measuring total and domain-specific sitting: a study of reliability  
34 and validity. *Med Sci Sports Exerc* 2010;42(6):1094-102. doi: 10.1249/MSS.0b013e3181c5ec18 [published  
35 Online First: 2009/12/10]
- 36 35. Klindworth A, Pruesse E, Schweer T, et al. Evaluation of general 16S ribosomal RNA gene PCR primers for  
37 classical and next-generation sequencing-based diversity studies. *Nucleic Acids Res* 2013;41(1):e1. doi:  
38 10.1093/nar/gks808 [published Online First: 2012/08/31]
- 39 36. Yang B, Wang Y, Qian PY. Sensitivity and correlation of hypervariable regions in 16S rRNA genes in  
40 phylogenetic analysis. *BMC Bioinformatics* 2016;17:135. doi: 10.1186/s12859-016-0992-y [published Online  
41 First: 2016/03/24]
- 42 37. Gohl DM, MacLean A, Hauge A, et al. An optimized protocol for high-throughput amplicon-based  
43 microbiome profiling. *Protocol Exchange* 2016 doi: <https://doi.org/10.1038/protex.2016.030>
- 44 38. Edgar RC, Haas BJ, Clemente JC, et al. UCHIME improves sensitivity and speed of chimera detection.  
45 *Bioinformatics* 2011;27(16):2194-200. doi: 10.1093/bioinformatics/btr381 [published Online First: 2011/06/28]
- 46 39. Shirai K, Utino J, Otsuka K, et al. A novel blood pressure-independent arterial wall stiffness parameter;  
47 cardio-ankle vascular index (CAVI). *J Atheroscler Thromb* 2006;13(2):101-7. [published Online First:  
48 2006/05/31]
- 49 40. Yamashina A, Tomiyama H, Takeda K, et al. Validity, reproducibility, and clinical significance of noninvasive  
50 brachial-ankle pulse wave velocity measurement. *Hypertens Res* 2002;25(3):359-64. [published Online First:  
51 2002/07/24]
- 52 41. Kawai T, Ohishi M, Onishi M, et al. Cut-off value of brachial-ankle pulse wave velocity to predict  
53 cardiovascular disease in hypertensive patients: a cohort study. *J Atheroscler Thromb* 2013;20(4):391-400.  
54 [published Online First: 2012/12/28]
- 55 42. Karimi L, Mattace-Raso FU, van Rosmalen J, et al. Effects of combined healthy lifestyle factors on functional  
56 vascular aging: the Rotterdam Study. *J Hypertens* 2016;34(5):853-9. doi: 10.1097/hjh.0000000000000861  
57 [published Online First: 2016/02/18]
- 58  
59  
60

- 1  
2  
3 43. Garcia-Ortiz L, Recio-Rodriguez JI, Agudo-Conde C, et al. Noninvasive validation of central and peripheral  
4 augmentation index estimated by a novel wrist-worn tonometer. *J Hypertens* 2018;36(11):2204-14. doi:  
5 10.1097/hjh.0000000000001806 [published Online First: 2018/05/31]  
6 44. Levey AS, Stevens LA, Schmid CH, et al. A new equation to estimate glomerular filtration rate. *Annals of*  
7 *internal medicine* 2009;150:604-12.  
8 45. Delgado C, Araneda A, Behrens MI. Validation of the Spanish-language version of the Montreal Cognitive  
9 Assessment test in adults older than 60 years. *Neurologia* 2019;34(6):376-85. doi: 10.1016/j.nrl.2017.01.013  
10 [published Online First: 2017/04/04]  
11 46. Freitas S, Simoes MR, Alves L, et al. Montreal Cognitive Assessment (MoCA): validation study for vascular  
12 dementia. *J Int Neuropsychol Soc* 2012;18(6):1031-40. doi: 10.1017/s135561771200077x [published Online  
13 First: 2012/06/09]  
14 47. Harris PA, Taylor R, Thielke R, et al. Research electronic data capture (REDCap)--a metadata-driven  
15 methodology and workflow process for providing translational research informatics support. *J Biomed Inform*  
16 2009;42(2):377-81. doi: 10.1016/j.jbi.2008.08.010 [published Online First: 2008/10/22]  
17 48. van den Munckhof ICL, Kurilshikov A, Ter Horst R, et al. Role of gut microbiota in chronic low-grade  
18 inflammation as potential driver for atherosclerotic cardiovascular disease: a systematic review of human  
19 studies. *Obes Rev* 2018;19(12):1719-34. doi: 10.1111/obr.12750 [published Online First: 2018/08/26]  
20 49. Menni C, Lin C, Cecelja M, et al. Gut microbial diversity is associated with lower arterial stiffness in women.  
21 *Eur Heart J* 2018;39(25):2390-97. doi: 10.1093/eurheartj/ehy226  
22 50. Kashtanova DA, Tkacheva ON, Doudinskaya EN, et al. Gut Microbiota in Patients with Different Metabolic  
23 Statuses: Moscow Study. *Microorganisms* 2018;6(4) doi: 10.3390/microorganisms6040098 [published Online  
24 First: 2018/09/28]  
25  
26

## 27 **Figure legends**

28 Figure 1: Study Flow chart  
29  
30  
31  
32  
33  
34  
35  
36  
37  
38  
39  
40  
41  
42  
43  
44  
45  
46  
47  
48  
49  
50  
51  
52  
53  
54  
55  
56  
57  
58  
59  
60

1  
2  
3  
4  
5  
6  
7  
8  
9  
10  
11  
12  
13  
14  
15  
16  
17  
18  
19  
20  
21  
22  
23  
24  
25  
26  
27  
28  
29  
30  
31  
32  
33  
34  
35  
36  
37  
38  
39  
40  
41  
42  
43  
44  
45  
46  
47  
48  
49  
50  
51  
52  
53  
54  
55  
56  
57  
58  
59  
60

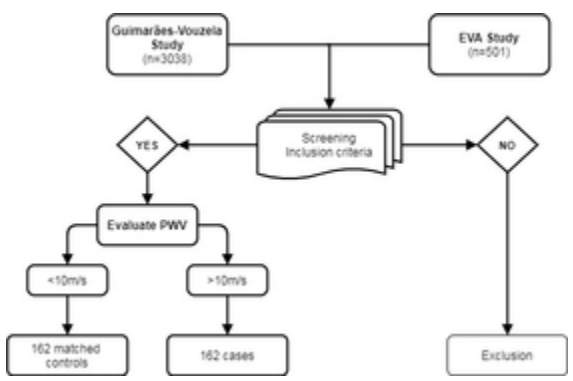

Figure 1: Study Flow chart  
23x15mm (300 x 300 DPI)

# BMJ Open

## Gut microbiota composition and arterial stiffness measured by pulse wave velocity. Case-control study protocol. (MIVAS study)

|                               |                                                                                                                                                                                                                                                                                                                                                                                                                                                                                                                                                                                                                                                                                                                                                                                                                                                                                                                                                                                                                                                                                                                                                                                                                                                                                                                                                                                                                                                                                                                                                                                                                                                                                                                                                                                                                                                                                                                                                                                                                                                                                                                                                                                                                                                                                                                                                                                                                                   |
|-------------------------------|-----------------------------------------------------------------------------------------------------------------------------------------------------------------------------------------------------------------------------------------------------------------------------------------------------------------------------------------------------------------------------------------------------------------------------------------------------------------------------------------------------------------------------------------------------------------------------------------------------------------------------------------------------------------------------------------------------------------------------------------------------------------------------------------------------------------------------------------------------------------------------------------------------------------------------------------------------------------------------------------------------------------------------------------------------------------------------------------------------------------------------------------------------------------------------------------------------------------------------------------------------------------------------------------------------------------------------------------------------------------------------------------------------------------------------------------------------------------------------------------------------------------------------------------------------------------------------------------------------------------------------------------------------------------------------------------------------------------------------------------------------------------------------------------------------------------------------------------------------------------------------------------------------------------------------------------------------------------------------------------------------------------------------------------------------------------------------------------------------------------------------------------------------------------------------------------------------------------------------------------------------------------------------------------------------------------------------------------------------------------------------------------------------------------------------------|
| Journal:                      | <i>BMJ Open</i>                                                                                                                                                                                                                                                                                                                                                                                                                                                                                                                                                                                                                                                                                                                                                                                                                                                                                                                                                                                                                                                                                                                                                                                                                                                                                                                                                                                                                                                                                                                                                                                                                                                                                                                                                                                                                                                                                                                                                                                                                                                                                                                                                                                                                                                                                                                                                                                                                   |
| Manuscript ID                 | bmjopen-2020-038933.R1                                                                                                                                                                                                                                                                                                                                                                                                                                                                                                                                                                                                                                                                                                                                                                                                                                                                                                                                                                                                                                                                                                                                                                                                                                                                                                                                                                                                                                                                                                                                                                                                                                                                                                                                                                                                                                                                                                                                                                                                                                                                                                                                                                                                                                                                                                                                                                                                            |
| Article Type:                 | Protocol                                                                                                                                                                                                                                                                                                                                                                                                                                                                                                                                                                                                                                                                                                                                                                                                                                                                                                                                                                                                                                                                                                                                                                                                                                                                                                                                                                                                                                                                                                                                                                                                                                                                                                                                                                                                                                                                                                                                                                                                                                                                                                                                                                                                                                                                                                                                                                                                                          |
| Date Submitted by the Author: | 29-Nov-2020                                                                                                                                                                                                                                                                                                                                                                                                                                                                                                                                                                                                                                                                                                                                                                                                                                                                                                                                                                                                                                                                                                                                                                                                                                                                                                                                                                                                                                                                                                                                                                                                                                                                                                                                                                                                                                                                                                                                                                                                                                                                                                                                                                                                                                                                                                                                                                                                                       |
| Complete List of Authors:     | <p>salvado, rita; Institute for Biomedical Research of Salamanca, Primary Health Care Research Unit of Salamanca (APISAL), Health Service of Castilla y León (SACyL)</p> <p>santos-minguez, sandra; Institute of Molecular and Cellular Biology of Cancer, Cancer Research Institute (USAL-CSIC). Institute for Biomedical Research of Salamanca (IBSAL)</p> <p>Agudo-Conde, Cristina; Institute for Biomedical Research of Salamanca, Primary Health Care Research Unit of Salamanca (APISAL), Health Service of Castilla y León (SACyL)</p> <p>Lugones-Sanchez, Cristina; Institute for Biomedical Research of Salamanca, Primary Health Care Research Unit of Salamanca (APISAL), Health Service of Castilla y León (SACyL)</p> <p>Cabo-Laso, Angela; Institute for Biomedical Research of Salamanca, Primary Health Care Research Unit of Salamanca (APISAL), Health Service of Castilla y León (SACyL)</p> <p>M<sup>a</sup> Hernandez-Sanchez, Jesus; Institute of Molecular and Cellular Biology of Cancer, Cancer Research Institute (USAL-CSIC). Institute for Biomedical Research of Salamanca (IBSAL)</p> <p>Benito, Rocio; Institute of Molecular and Cellular Biology of Cancer, Cancer Research Institute (USAL-CSIC), Institute for Biomedical Research of Salamanca (IBSAL)</p> <p>Rodriguez-Sanchez, Emiliano; Institute for Biomedical Research of Salamanca, Primary Health Care Research Unit of Salamanca (APISAL), Health Service of Castilla y León (SACyL); University of Salamanca, Medicina</p> <p>Gomez-Marcos, Manuel; Institute for Biomedical Research of Salamanca, Primary Health Care Research Unit of Salamanca (APISAL), Health Service of Castilla y León (SACyL); University of Salamanca, Department of Medicine</p> <p>Hernandez-Rivas, Jesus; Institute of Molecular and Cellular Biology of Cancer, Cancer Research Institute (USAL-CSIC). Institute for Biomedical Research of Salamanca (IBSAL); University of Salamanca, Department of Medicine, Hematology, University Hospital of Salamanca</p> <p>Guimarães Cunha, Pedro; University of Minho, Life and Health Sciences Research Institute (IICVS). School of Medicine</p> <p>Garcia-Ortiz, Luis; Institute for Biomedical Research of Salamanca, Primary Health Care Research Unit of Salamanca (APISAL), Health Service of Castilla y León (SACyL); University of Salamanca, Department of Biomedical and Diagnostic Sciences</p> |

1  
2  
3  
4  
5  
6  
7  
8  
9  
10  
11  
12  
13  
14  
15  
16  
17  
18  
19  
20  
21  
22  
23  
24  
25  
26  
27  
28  
29  
30  
31  
32  
33  
34  
35  
36  
37  
38  
39  
40  
41  
42  
43  
44  
45  
46  
47  
48  
49  
50  
51  
52  
53  
54  
55  
56  
57  
58  
59  
60

|                                   |                                                                                                                                                                              |
|-----------------------------------|------------------------------------------------------------------------------------------------------------------------------------------------------------------------------|
|                                   | Investigators, MIVAS                                                                                                                                                         |
| <b>Primary Subject Heading:</b>   | Cardiovascular medicine                                                                                                                                                      |
| <b>Secondary Subject Heading:</b> | Gastroenterology and hepatology                                                                                                                                              |
| <b>Keywords:</b>                  | Protocols & guidelines < HEALTH SERVICES ADMINISTRATION & MANAGEMENT, Microbiology < NATURAL SCIENCE DISCIPLINES, Vascular medicine < INTERNAL MEDICINE, PREVENTIVE MEDICINE |
|                                   |                                                                                                                                                                              |

SCHOLARONE™  
Manuscripts

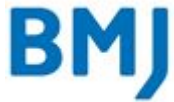

I, the Submitting Author has the right to grant and does grant on behalf of all authors of the Work (as defined in the below author licence), an exclusive licence and/or a non-exclusive licence for contributions from authors who are: i) UK Crown employees; ii) where BMJ has agreed a CC-BY licence shall apply, and/or iii) in accordance with the terms applicable for US Federal Government officers or employees acting as part of their official duties; on a worldwide, perpetual, irrevocable, royalty-free basis to BMJ Publishing Group Ltd ("BMJ") its licensees and where the relevant Journal is co-owned by BMJ to the co-owners of the Journal, to publish the Work in this journal and any other BMJ products and to exploit all rights, as set out in our [licence](#).

The Submitting Author accepts and understands that any supply made under these terms is made by BMJ to the Submitting Author unless you are acting as an employee on behalf of your employer or a postgraduate student of an affiliated institution which is paying any applicable article publishing charge ("APC") for Open Access articles. Where the Submitting Author wishes to make the Work available on an Open Access basis (and intends to pay the relevant APC), the terms of reuse of such Open Access shall be governed by a Creative Commons licence – details of these licences and which [Creative Commons](#) licence will apply to this Work are set out in our licence referred to above.

Other than as permitted in any relevant BMJ Author's Self Archiving Policies, I confirm this Work has not been accepted for publication elsewhere, is not being considered for publication elsewhere and does not duplicate material already published. I confirm all authors consent to publication of this Work and authorise the granting of this licence.

BMJ Open

**Title: Gut microbiota composition and arterial stiffness measured by pulse wave velocity. Case-control study protocol. (MIVAS study)****Short title: Gut microbiota and arterial stiffness**

Rita Salvado<sup>1(#)</sup>, Sandra Santos-Minguez<sup>2</sup>, Cristina Agudo-Conde<sup>1</sup>, Cristina Lugones-Sanchez<sup>1</sup>, Angela Cabo-Laso<sup>1</sup>, Jesus M<sup>a</sup> Hernandez-Sanchez<sup>2</sup>, Rocio Benito<sup>2</sup>, Emiliano Rodriguez-Sanchez<sup>1,3</sup>, Manuel A Gomez-Marcos<sup>1,3</sup>, Jesus M Hernandez-Rivas<sup>2,4</sup>, Pedro Guimarães-Cunha<sup>5(\*)</sup>, Luis García-Ortiz<sup>1,6(\*)</sup>, on behalf MIVAS investigators<sup>7</sup>.

(\*) Both authors equally contributed as senior authors in the study.

1. Institute of Biomedical Research of Salamanca (IBSAL), Primary Health Care Research Unit of Salamanca (APISAL), Health Service of Castilla y León (SACyL), Salamanca, Spain.
2. Institute of Molecular and Cellular Biology of Cancer (IBMCC), Cancer Research Institute (CIC, USAL-CSIC), Institute of Biomedical Research of Salamanca (IBSAL)
3. Department of Medicine, University of Salamanca, Salamanca, Spain.
4. Hematology Department, University Hospital of Salamanca, Salamanca, Spain.
5. Life and Health Sciences Research Institute (IICVS). School of Medicine, University of Minho. Portugal.
6. Department of Biomedical and Diagnostic Sciences, University of Salamanca, Salamanca, Spain.
7. Iberian Network on Arterial Structure, Central Hemodynamics and Neurocognition.

**#Corresponding author:**

Rita Salvado Martins  
Unidad de Investigación de Atención Primaria de Salamanca (APISAL)  
Centro de salud de San Juan  
Av. Portugal 83, 2<sup>o</sup> P  
37005 Salamanca. Spain  
Tel: +34 923 291100. Ext 54750  
E-mail: [ritasalvado@usal.es](mailto:ritasalvado@usal.es)

**E-mail:**

RS: [ritasalvado@usal.es](mailto:ritasalvado@usal.es)  
SSM: [ssantosminguez@gmail.com](mailto:ssantosminguez@gmail.com)  
CAC: [cagudoconde@yahoo.es](mailto:cagudoconde@yahoo.es)  
CLS: [crislugsa@gmail.com](mailto:crislugsa@gmail.com)  
ACL: [angeladecabo@yahoo.es](mailto:angeladecabo@yahoo.es)  
JMHS: [jesus807@gmail.com](mailto:jesus807@gmail.com)  
RB: [beniroc@usal.es](mailto:beniroc@usal.es)  
ERS: [emiliano@usal.es](mailto:emiliano@usal.es)  
MGM: [magomez@usal.es](mailto:magomez@usal.es)  
JMHR: [jmhr@usal.es](mailto:jmhr@usal.es)  
PGC: [pedrocunha@med.uminho.pt](mailto:pedrocunha@med.uminho.pt)  
LGO: [lgarciao@usal.es](mailto:lgarciao@usal.es)  
MIVAS Group: [apisal2020@gmail.com](mailto:apisal2020@gmail.com)

BMJ Open

## Article Summary

### Introduction

Intestinal microbiota is arising as a new element in the physiopathology of cardiovascular diseases. A healthy microbiota includes a balanced representation of bacteria with health promotion functions (symbiotes). The aim of the study is to analyze the relationship between intestinal microbiota composition and arterial stiffness.

### Methods and analysis

An observational case-control study will be developed. Cases will be defined by the presence of at least one of the following: carotid-femoral pulse wave velocity (cf-PWV), cardio-ankle Vascular Index (CAVI), brachial ankle pulse wave velocity (ba or ba-PWV above the 90th percentile, for age and sex, of the reference population); Controls will be selected from the same population as cases. The study will be developed in Primary Health Care Centers. We will select 500 subjects (250 cases and 250 controls), between 45 and 74 years of age. Cases will be selected from a database that combines data from EVA Study (Spain) and Guimarães/Vizela Study (Portugal). Measurements: cf-PWV will be measure using the SphygmoCor® System, CAVI, ba-PWV and ankle-brachial index will be determined using Vasera® device. Gut microbiome composition in faecal samples will be determined by 16S rRNA sequencing. Lifestyle will be assessed by food frequency questionnaire, adherence to the Mediterranean diet, and IPAQ questionnaire. Body composition will be evaluated by bioimpedance.

### Ethics and dissemination

The study has been approved by Committee of ethics of research with medicines of the health area of Salamanca" in 14/12/2018 (cod. 2018-11-136) and the "Ethics committee for health of Guimaraes" (Portugal) in 15/10/2019 (ref: 67/2019). All study participants will sign an informed consent form agreeing to participate in the study, in compliance with the declaration of Helsinki and the WHO standards for observational studies. The results of this study will allow a better description of gut microbiota in patients with arterial stiffness.

**Trial Registration Number:** NCT03900338 (<https://clinicaltrials.gov/ct2/show/NCT03900338>)

**Keywords:** gut microbiota, arterial stiffness, pulse wave velocity, case-control study, protocol



BMJ Open

**Strengths and limitations**

- Observational multicentric and multi-country case-control study evaluating the relationship of gut microbiota and arterial stiffness, in 500 subjects from 40 to 74 years of age.
- 250 cases defined by the presence of at least one of the following: cf-PWV, CAVI or ba-PWV above the 90th percentile, for age and sex, of the reference population. Cases will be matched with 250 controls using propensity score.
- Analyses the composition of the gut microbiome in faecal samples by 16S rRNA sequencing.
- It is not a random sample, and therefore it cannot be said that the representation is population-based.
- Some of the drugs taken by the included subjects could modify the microbiota.

11/11/2020, Version 2

## INTRODUCTION

Cardiovascular diseases (CVD) are the leading cause of morbidity and mortality globally.<sup>1</sup> In the latest years, a big effort has been made to improve the identification of individuals at high risk of suffering a cardiovascular event, looking beyond classical risk factors, using biomarkers that reflect early functional or morphological changes, before overt disease manifests, allowing timely treatment of subclinical disease.<sup>2</sup>

Arterial stiffness has been proven to have a good predictive value for CVD,<sup>3</sup> in various populations, with different levels of risk: general population, elderly, patients with type 2 diabetes, hypertension or end stage renal disease.<sup>4</sup> Arterial stiffness reflects the aortic wall damage caused by several cardiovascular risk factors, over a long period of time, signaling the patients in which arterial risk factors were translated to real risk.<sup>5</sup> There are several methods to measure arterial stiffness. Carotid to femoral pulse wave velocity (cf-PWV) is the gold standard,<sup>6</sup> others widely accepted are: CAVI, which measures the stiffness of the aorta, femoral artery and tibial artery;<sup>7</sup> ba-PWV, which uses brachial and tibial arterial waves.<sup>8</sup>

The evaluation of carotid Intima–media thickness (IMT) can identify the presence of atherosclerotic plaques which traduces structural damage on the artery.

The major determinants of arterial stiffness are age and hypertension but gender and classical cardiovascular risk factors also play an important role.<sup>5</sup> Other factors, as genetic burden, systemic inflammatory diseases and gut microbiota,<sup>9</sup> have also been linked to pulse wave velocity. Gut microbiota composition has also been implicated on the genesis of hypertension,<sup>10</sup> obesity,<sup>11</sup> insulin resistance, metabolic syndrome<sup>11</sup> and type 2 diabetes.<sup>12</sup>

Gut microbiota is a new player in the pathophysiology of cardiovascular disease. There are 100 trillion bacteria in the human gut, with 3,3 million non-redundant genes, a hundred times the human genome, which gives human microbiome a huge metabolic potential. In adult's

BMJ Open

1  
2  
3 gut microbiota, the majority of the microbial populations belong to the bacteria domain, with  
4  
5 approximately 90% of *Bacteroidetes* and *Firmicutes phyla*. Commensal gut microbiota has two  
6  
7 main functions: intervenes in human immunologic response and contributes to energy  
8  
9 harvest from no digestible starches.  
10  
11

12  
13 The shift from a healthy microbiota toward dysbiosis mean that there is an increase in  
14  
15 pathobionts and is likely to be triggered by environmental factors.<sup>11</sup> Although age and gut's  
16  
17 genetically defined architecture are the most relevant factors influencing gut's microbiome  
18  
19 composition<sup>13</sup>, diet and lifestyle are likely the major causes of inter-individual variation in the  
20  
21 composition of human gut's microbiome. There is evidence that the consumption of artificial  
22  
23 sweeteners,<sup>14</sup> dietary emulsifiers,<sup>15</sup> a high-salt diet<sup>16</sup> and obesity<sup>17</sup> alter the gut microbiota,  
24  
25 reduce microbial diversity and induce inflammation, whereas a diet rich in vegetables has  
26  
27 been linked with a healthy microbial diversity<sup>18 19</sup>.  
28  
29

30  
31  
32 Dysbiosis is characterized by a greater amount of pro-inflammatory species, that favor  
33  
34 metabolic diseases development, caused by both diet-dependent and independent  
35  
36 mechanisms.<sup>11 20</sup> Diet independent mechanisms are mediated by two major receptor families  
37  
38 that detect microbes: Toll-like Receptors (TLRs) and Nod-like Receptors (NLRs), which sense  
39  
40 the presence of intracellular microbes.<sup>21</sup> The activation of these receptors trigger  
41  
42 inflammatory reactions, in the liver, white adipose tissue, brain, and other organs, and trigger  
43  
44 metabolic diseases, such as insulin resistance.<sup>22</sup>  
45  
46

47  
48  
49 Diet dependent mechanisms result from microbial enzymatic activities. Some are beneficial,  
50  
51 like microbial fermentation of polysaccharides, producing SCFA, and bile-acid. Others are  
52  
53 detrimental, such as phosphatidylcholine metabolization by intestinal microorganisms, that  
54  
55 results in the production of trimethylamine N-oxide (TMAO), which is associated with  
56  
57 cardiovascular disease development and progression.<sup>23-25</sup>  
58  
59  
60

BMJ Open

1  
2  
3 Our hypothesis is that patients with arterial stiffness, have a different intestinal flora, when  
4 compared with healthy controls, ie, subject free of cardiovascular disease. We also  
5  
6 hypothesize that gut microbiota will be different in subjects with different lifestyles, body  
7  
8 composition, as well as with target organ damage and neurocognition.  
9  
10

11  
12  
13 The main objective of this study will be to analyse the relationship between intestinal  
14  
15 microbiota composition and arterial stiffness in a population without cardiovascular disease.  
16  
17

18  
19  
20 As secondary objectives we will consider the relationship of gut microbiota with other  
21  
22 measures of vascular structure and function, end organ disease, cognition, cardiovascular risk  
23  
24 factors, body composition and lifestyles. We will also analyse gender differences in intestinal  
25  
26 microbiota composition and its relationship with vascular structure and function.  
27  
28  
29

## 30 31 32 **METHODS AND ANALYSIS**

### 33 34 **Design and setting**

35  
36  
37 This is an observational, multicentric, case-control study. Cases will be defined by the  
38  
39 presence of at least one of the following: cf-PWV, CAVI or ba-PWV above the 90th percentile,  
40  
41 for age and sex, of the reference population. It will be an international study including  
42  
43 patients from two neighbor countries: Portugal, through the Life and Health Sciences  
44  
45 Research Institute, Minho University (Braga) and Spain, through the Primary Care Research  
46  
47 Unit of Salamanca (APISAL) belonging to the Biomedical Research Institute of Salamanca  
48  
49 (IBSAL) and Cancer Research Institute of Salamanca (CIC) that will also perform gut microbiota  
50  
51 analysis.  
52  
53  
54  
55  
56  
57  
58  
59  
60

BMJ Open

## STUDY POPULATION

We will select 500 subjects, aged 45 to 74 years, free of cardiovascular disease. We will recruit patients from a database that combines data from EVA study<sup>26</sup> (Spain) and Guimarães/Vizela Study<sup>27</sup> (Portugal), and if necessary, we will incorporate new patients who meet the inclusion criteria to complete the sample (Figure 1). Controls will be selected from the same population as cases. The methodology of these studies was published elsewhere.<sup>26 27</sup>

### Selection criteria

*Inclusion criteria:* Patients between 45 and 74 years-old, who agree to participate in the study and do not meet any of the exclusion criteria.

*Exclusion criteria:* history of CVD (ischemic heart disease or stroke, peripheral arterial disease or heart failure), diabetes mellitus, renal failure in terminal stages (glomerular filtration rate below 30%), chronic inflammatory diseases, inflammatory bowel disease, body mass index >40kg/m<sup>2</sup>, oncologic disease diagnosed in the last 5 years and/or under treatment, terminal conditions, antibiotic use within the last 15 days and those who refuse to sign the informed consent.

### Sample size

The sample size was estimated to detect a minimum odds ratio of 1.75 in the study factor (microbiota dysbiosis), considering vascular stiffness as a dependent variable and accepting an  $\alpha$  risk of 0.05 and a  $\beta$  risk of 0.20, in a two-sided test, assuming a rate of losses due to technical difficulties or refusal to participate of 5%, and a rate of exposure of 0.3%, in the control group. Therefore, it will be necessary to include 500 subjects, 250 with arterial stiffness and 250 controls.

BMJ Open

### **Patient and Public Involvement**

Patients will not participate in the study design, however they will actively participate in the study recruitment by disseminating the study objectives and inclusion criteria through their organizations. At the end of the study, in addition to sending a detailed report with the results of each patient, a dissemination session will be organized for all patients included in the study. Some of the participants will take part in this conference to share their experience and their personal evaluation of the study results.

### **VARIABLES AND MEASUREMENT INSTRUMENTS**

General and potentially effect-modifying variables such as age, gender, occupation, family history of CVD, hypertension, dyslipidemia, hypothyroidism and drug use will be documented.

#### **Anthropometric measurements**

Body weight will be measured twice, using a homologated electronic scale (Seca® 770 medical scale and measurement systems, Birmingham, UK) after calibration (precision $\pm$ 0.1kg), with the patient wearing light clothing and barefoot. Body mass index (BMI) will be calculated as weight (kg) divided by height (m) squared. Waist circumference will be measured using a flexible graduated measuring tape, with the patient in the standing position, without clothing.

Body composition will be determined by the Inbody 230 monitor (InBody® Co., Ltd. Seoul, Korea), which gives information of body composition analysis.

Office or Clinical Blood Pressure (BP) will involve three measurements of systolic BP (SBP) and diastolic BP (DBP), using the average of the last two, with a validated OMRON model by following the recommendations of the European Society of Hypertension (ESH).<sup>28</sup>

BMJ Open

## Habits and lifestyles

**Diet:** Adherence to the Mediterranean diet, will be measured using the validated 14-point Mediterranean Diet Adherence Screener (MEDAS),<sup>29</sup> developed by the PREDIMED study group. Each question will be scored as 0 or 1. Adequate adherence to the Mediterranean diet will be assumed when the total score is  $\geq 9$  points.

With the APP developed in the EVIDENT study<sup>30</sup> (registry number 00/2014/2207), food consumption will be recorded during a usual week.

The dietary habits of participants will be assessed using a semi-quantitative 137-item food-frequency questionnaire (FFQ), previously validated in Spain<sup>31</sup> and Portugal<sup>32</sup>. The FFQ is based on typical portion sizes that will be multiplied by the consumption frequency for each food. This estimated frequency refers to the previous year, from the time of the interview, and is divided into 9 intake frequency categories ranging from never to more than 6 servings/day.

**Physical activity:** Two questionnaires will be used to assess physical activity:

*International Physical Activity Questionnaire-Short Form (IPAQ-SF)*. The short form (9 items) categorizes physical activity for the last 7 days in three levels of intensity: (1) intense physical activity, (2) moderate-intensity activity, (3) light.<sup>33</sup>

*Questionnaire hours seated (Marshall)*: Measures the amount of time spent sitting, at work, in the displacements and at home, during week days and weekend.<sup>34</sup>

**Tobacco and alcohol consumption:** Standardize questionnaire will be used to assess tobacco and alcohol use.

## Laboratory measurements

Venous blood samples will be taken between 08:00 and 09:00 am, after participants have fasted and abstained from smoking, alcohol and caffeinated beverages consumption, for 12

BMJ Open

1  
2  
3 hours. Fasting plasma glucose, creatinine, uric acid, liver function and lipids levels will be  
4  
5 measured using standard enzymatic automated methods. A blood sample of each participant  
6  
7 will be frozen for posterior evaluation of total biliary acids, deoxycholic acid and SCFA  
8  
9 concentration (mg/ml).  
10  
11

### 12 13 **Gut microbiota measurements**

14  
15 Stool samples will be collected by participants with the OMNIgene GUT (OMR -200) kit that  
16  
17 permits transport and store with preservation of stabilized DNA, at room temperature, for 60  
18  
19 days. This kit allows obtaining high quality DNA suitable for 16S rRNA microbiome profiling  
20  
21 and ensures microbiota profiles accurately represent the in vivo state. All specimens will be  
22  
23 sent to the Cancer Research Center in Salamanca.  
24  
25

26  
27 DNA will be extracted using the FastDNA Soil method, according to the manufacturer's  
28  
29 instructions [FastDNA® SPIN Kit for Soil (MP Biomedicals, USA)]. DNA will be extracted from  
30  
31 100-150ul of different feces samples. Each sample will be added to a Lysing Matrix E tube  
32  
33 (each tube contains 1.4mm ceramic spheres, 0.1mm silica spheres and one 4mm glass beads)  
34  
35 and mixed with different buffers to solubilize membrane proteins, extra-cellular proteins and  
36  
37 contaminants in the samples. Afterwards, the sample mix will be homogenized in the Cell  
38  
39 disrupter Thermo Savant Fastprep FP120 at 6m/second for 40 seconds. This allows a  
40  
41 mechanical disruption of cell walls of the present organisms. DNA will then be eluted with  
42  
43 50ul of DNase/Pyrogen-Free Water (DES), after successive washing steps through the silica  
44  
45 Binding Matrix where the purified nucleic acids were retained. Finally, purified DNA will be  
46  
47 measured in the Nanodrop, to check quality and quantity.  
48  
49  
50  
51  
52

53  
54 DNA yield ( $\text{ng } \mu\text{l}^{-1}$ ) will be quantified spectrophotometrically with a NanoDrop 2000c  
55  
56 Spectrophotometer (Thermo Fisher Scientific, USA). It will also be quantified fluorometrically  
57  
58 in a TapeStation 2200, using Genomic DNA ScreenTapes (Agilent, USA) and in a Qubit 4.0  
59  
60



BMJ Open

1  
2  
3 fluorometer (Invitrogen, USA). DNA extraction efficiency will be calculated as the total  
4 amount of DNA extracted per biomass ( $\mu\text{g g wet wt}^{-1}$ ). NanoDrop will also be used to  
5 estimate the purity of the extracted DNA. Low absorption ratios at 260/280nm ( $<1.7$ ) will be  
6 used as an indicator of protein impurities, and low absorption ratios at 260/230nm ( $<2$ ) will  
7 be used as an indicator of contamination from polysaccharides. The TapeStation system  
8 performs electrophoresis in so-called ScreenTapes and outputs images of DNA integrity as  
9 well as a DNA Integrity Number (DIN) based on the sizes of the isolated DNA. The DIN ranges  
10 from 1 to 10, and a high DIN indicates large DNA fragments, whereas a low DIN indicates more  
11 fragmented DNA. DIN determines the fragmentation of a genomic DNA sample by assessing  
12 the distribution of signal across the size range using a proprietary algorithm.

### 27 **Amplicon and Illumina sequencing of bacterial 16S rRNA genes**

28 Amplicon sequences of bacterial 16S rRNA genes, which target v3-v4 regions, will be obtained  
29 using Illumina predesigned primer pair, as previously described<sup>35</sup>:

30 *S-D-Bact-0341-b-S-17*, 5'-CCTACGGGNGGCWGCAG-3' and *S-D-Bact-0785-a-A-21*, 5'-  
31 GACTACHVGGGTATCTAATCC-3', with a length of 465 bp.

32 Since v5-v6 regions have also been considered the most conserved regions, together with  
33 v4<sup>36</sup>, and two of the most relevant regions for phylogenetic classification, we will also analyze  
34 these regions. The v5-v6 primers were obtained from<sup>37</sup> being the sequences: V5F\_Nextera 5'-  
35 RGGATTAGATACCC-3' and V6R\_Nextera 5'- CGACRRCCATGCANACCT-3', with a length of  
36 281bp. Both primers pair, targeting the variable regions v3-v4 and v5-v6 are equipped with  
37 Illumina adapter overhang nucleotide sequences:

- 38 • *Forward overhang: 5' TCGTCGGCAGCGTCAGATGTGTATAAGAGACAG-[locus-specific sequence]*
- 39 • *Reverse overhang: 5' GTCTCGTGGGCTCGGAGATGTGTATAAGAGACAG-[locus-specific sequence].*

BMJ Open

1  
2  
3 The resulting amplicons will be purified using Agencourt AMPure XP (Beckman Coulter) as  
4 recommended by the manufacturer. They will then be amplified in a second PCR where the  
5 indexes will be added. The index is unique for each sample of each patient. Once the samples  
6 are indexed and identified, the last purification using the Agentcourt AMPure XP kit will be  
7 performed. At this point, amplicon libraries of each sample are generated. These libraries  
8 should be quantified in the Qubit, normalized and pooled in equimolar amounts. The pooled  
9 samples will be sequenced, using an Illumina MiSeq with 2 × 300bp v3 chemistry, to obtain  
10 high quality scores.  
11  
12  
13  
14  
15  
16  
17  
18  
19  
20  
21  
22

### 23 **Bioinformatics**

24 Raw sequence data will be analyzed using an *in-house* pipeline. This pipeline includes base  
25 pair quality filtering, alignment and comparison to a reference database. Quality passing-filter  
26 readings will be clustered into operational taxonomic units (OTUs). Then, we will compare  
27 control *versus* cases samples. All the microbiome differences will be then interpreted and  
28 classified. Quality control will be carried out on a *per sample* basis, discarding paired-ends  
29 with an overlap of less than 200nt and removing chimeric sequences using de novo chimaera  
30 detection in USEARCH.<sup>38</sup>  
31  
32  
33  
34  
35  
36  
37  
38  
39  
40  
41

### 42 **Vascular structure and function**

#### 43 **Carotid-femoral pulse wave velocity (cf-PWV) and Central Augmentation Index (CAIx):**

44 These parameters will be estimated using the SphygmoCor System (AtCor Medical Pty Ltd,  
45 Head Office, West Ryde, Australia). With the patient sitting and resting his/her arm on a rigid  
46 surface, pulse wave analysis will be performed with a sensor in the radial artery, using a  
47 mathematical transformation to estimate the aortic pulse wave. CAIx will be estimated from  
48 aortic wave morphology using the following formula: increase in central pressure×100/pulse  
49 pressure, and it will be adjusted for a heart rate of 75 bpm. Carotid and femoral artery pulse  
50  
51  
52  
53  
54  
55  
56  
57  
58  
59  
60

BMJ Open

1  
2  
3 waves will be analyzed, with the patient in a supine position, using the SphygmoCor System,  
4  
5 estimating the delay, as compared with the ECG wave, and calculating cf-PWV. Distance  
6  
7 measurements will be taken with a measuring tape from the sternal notch to the carotid and  
8  
9 femoral arteries at the sensor location and will be multiplied by 0.8. Subclinical organ damage  
10  
11 will be defined as cf-PWV, above the 90<sup>th</sup> percentile, for age and sex, of the reference  
12  
13 population.<sup>39</sup>  
14  
15

### 16 17 **Cardio-ankle Vascular Index (CAVI), brachial ankle PWV (ba-PWV) and Ankle Brachial Index**

18  
19 **(ABI):** These parameters will be estimated using the Vasera device VS-2000 (Fukuda Denshi  
20  
21 Co., Ltd. Tokyo, Japan). CAVI values will be automatically calculated by substituting the  
22  
23 stiffness parameters in the following equation to detect the vascular elasticity and the cardio  
24  
25 ankle PWV: stiffness parameter  $\beta = 2\rho \times 1 / (P_s - P_d) \times \ln(P_s / P_d) \times PWV^2$ , where  $\rho$  is the blood  
26  
27 density,  $P_s$  and  $P_d$  are SBP and DBP in mmHg, and PWV is measured between the aortic valve  
28  
29 and ankle. The average coefficient of the variation of CAVI is <5%, which is small enough for  
30  
31 clinical use and confirms that CAVI has favorable reproducibility.<sup>40</sup> The ba-PWV will be  
32  
33 estimated using the following equation:  $ba-PWV = ((0.5934 \times \text{height}(\text{cm}) + 14.4724)) / t_{ba}$ , where  
34  
35  $t_{ba}$  is the time the same waves were transmitted to the ankle.<sup>41</sup> For this study, the mean ABI,  
36  
37 CAVI and ba-PWV obtained will be considered. CAVI will be classified as: normal (CAVI <8),  
38  
39 borderline ( $8 \leq CAVI < 9$ ) and abnormal (CAVI  $\geq 9$ )<sup>42</sup>. Subclinical organ damage will be defined,  
40  
41 CAVI or ba-PWV above the 90<sup>th</sup> percentile of the reference population<sup>39</sup>. ABI  $\leq 0.9$  will be  
42  
43 considered abnormal<sup>2</sup>.  
44  
45  
46  
47  
48  
49  
50  
51  
52  
53  
54

55 **Central and peripheral augmentation index by the wrist-worn device:** Participants will be  
56  
57 examined in a seated position, after 10 minutes of rest with his/her arm supported on a firm  
58  
59 surface, at heart height. The wrist-worn device has been developed by Microsoft Research  
60

BMJ Open

(Redmond, Washington, United States) and was recently validated<sup>43</sup>. We will use this device to make a short recording of the radial pulse wave, from which PAIx and CAIx will be obtained. PAIx will be calculated as  $(\text{second peak SBP (SBP2)} - \text{DBP}) / (\text{first peak SBP} - \text{DBP}) \times 100$ , to yield a percentage (%) value. From the estimated morphology of the aortic wave, by mathematical transformation specific to the wrist-worn device, CAIx will be calculated using the following formula:  $\text{central augmentation pressure} \times 100 / \text{pulse pressure}$ .

**Assessment of vascular structure by Carotid IMT (C-IMT):** Carotid ultrasound will be performed by investigators trained for this purpose before starting the study, to assess C-IMT. Measurements will be made of the common carotid after the examination of a 10 mm longitudinal section at a distance of 1cm from the bifurcation, performing measurements in the proximal and in the distal wall in the lateral, anterior and posterior projections, following an axis perpendicular to the artery to discriminate two lines, one for the intima blood interface and the other for the media-adventitious interface. The measurements will be obtained with the participant lying down, with the head extended and slightly turned opposite to the examined carotid artery. Pathologic intima media thickening:  $\text{IMT} > 0.9\text{mm}$ , or atheromatous plaque diameter greater than 1.5mm, or focal increase of 0.5mm or 50% of the adjacent GIM.<sup>28</sup>

#### **Renal and Cardiac assessment**

Kidney damage will be assessed by the estimated glomerular filtration rate using the Chronic Kidney Disease Epidemiology Collaboration (CKD-EPI)<sup>44</sup> equation and albumin-creatinine ratio, following the criteria of the ESH<sup>28</sup>. Cardiac examination will be performed using a electrocardiogram device (ECG). ECG left ventricular hypertrophy will be defined as a Sokolow-Lyon index  $>3.5\text{mV}$ , or Cornell VDP  $>244\text{mV} \times \text{ms}$ .<sup>28</sup>

#### **Cognitive assessment**

BMJ Open

1  
2  
3 The **Montreal Cognitive Assessment (MoCA)**, a screening tool of dementia, validated in  
4 Spain<sup>45</sup> and Portugal<sup>46</sup> will be applied. The MoCA was designed as a rapid screening  
5 instrument for mild cognitive dysfunction. It assesses different cognitive domains: attention  
6 and concentration, executive functions, memory, language, visuo-constructional skills,  
7 conceptual thinking, calculations and orientation. Time estimated for MoCA administration is  
8 approximately 10 minutes. The total possible score is 30 points; a score of 26 or above is  
9 considered normal.

10  
11  
12  
13  
14  
15  
16  
17  
18  
19  
20 Investigators applying the different tests will be blinded to participants clinical data. All  
21 assessments will be carried out within 10 days.

### 22 23 24 25 **STATISTICAL ANALYSIS**

26  
27 Data input will be performed using the REDCap (System Electronic Data Capture),<sup>47</sup> with a  
28 questionnaire previously designed for the project. Normal distribution of variables will be  
29 verified using the Kolmogorov-Smirnov test. Quantitative variables will be displayed as  
30 mean±SD, if normally distributed, or as median (IQR), if asymmetrically distributed, and  
31 qualitative variables will be expressed as frequencies. Analysis of difference of means  
32 between variables of two categories will be carried out using a Student' t-test or a Mann-  
33 Whitney U test, as appropriate, while qualitative variables will be analyzed using a  $\chi^2$  test. To  
34 analyze the relationship between qualitative variables of more than two categories, and  
35 quantitative variables, an analysis of variance and the least significant difference test will be  
36 used in the post hoc tests; a Kruskal-Wallis test will be used in cases where the variables are  
37 not normally distributed. The relationship of quantitative variables to each other will be  
38 tested using Pearson or Spearman correlation, as appropriate. Analysis of covariance  
39 (ANCOVA) will be performed to adjust for the variables that can affect the results as  
40 confounders. Logistic regression will be performed to evaluate the association between the  
41  
42  
43  
44  
45  
46  
47  
48  
49  
50  
51  
52  
53  
54  
55  
56  
57  
58  
59  
60

BMJ Open

1  
2  
3 study factor (gut microbial diversity) and the dependent variable (arterial stiffness)), adjusted  
4  
5 for possible confounding variables (sex, age, BMI, hypertension). A multiple linear regression  
6  
7 will also be performed to analyze the relationship of the study ctor (gut microbiota) with the  
8  
9 variables that analyze vascular structure and function quantitatively. This regression, and all  
10  
11 the others multivariate analyses performed, will be adjusted for the same confounding  
12  
13 variables as the logistic regression.  
14  
15  
16

17  
18 Data will be analyzed using the SPSS V.23.0 statistical package (SPSS Inc, Chicago, Illinois,  
19  
20 USA). A value of  $p < 0.05$  will be considered statistically significant. The  
21  
22 statisticians/researchers who perform the different analyses will be blinded to participants  
23  
24 clinical data.  
25  
26

## 27 **QUALITY CONTROL**

28  
29 Different processes will be carried out to guarantee study data quality and thus maximize  
30  
31 validity and reliability of measurements and results. For this purpose, field work operation  
32  
33 manuals have been prepared. Educational leaflets will be developed to ensure correct stool  
34  
35 collection. All of these actions will assure an adequate performance at each procedure.  
36  
37 Monthly meetings will be held, with the investigators of both Centers, to analyze the entire  
38  
39 process, and annual reports on study progress will be prepared.  
40  
41  
42  
43

## 44 **PROJECT SCHEDULE**

45  
46 This project will be performed in 3 years. In the first 2 years we will perform sample selection  
47  
48 and inclusion and data collection using the previously mentioned questionnaires. During the  
49  
50 third year, analysis and dissemination of the results will be held.  
51  
52  
53

## 54 **ETHICS AND DISSEMINATION**

### 55 **Ethical considerations**

56  
57  
58  
59  
60

BMJ Open

1  
2  
3 The study was approved by the “Committee of ethics of research with medicines of the health  
4 area of Salamanca” in 14/12/2018 (cod. 2018-11-136) and the “Ethics committee for health  
5 of Guimaraes” (Portugal) in 15/10/2019 (ref: 67/2019). Participants must provide informed  
6 consent, in accordance with the Declaration of Helsinki. Confidentiality of participants data  
7 will always be guaranteed, in accordance with the Regulation (EU) 2016/679 of the European  
8 Parliament and of the Council of 27 April 2016, on the protection of natural persons with  
9 regard to the processing of personal data and on the free movement of such data, and  
10 repealing Directive 95/46/EC.  
11  
12

13 A SPIRIT checklist is available for this protocol. The clinical trial has been registered at  
14 ClinicalTrials.gov, with the identifier NCT03900338.  
15  
16

### 17 **Dissemination plan**

18 Data will be available to members of the research group and members of the Iberian Network  
19 on Arterial Structure, Central Hemodynamics and Neurocognition, following the criteria  
20 previously defined by the management team.  
21  
22

23 The research group plans to achieve rapid and widespread dissemination of results to ensure  
24 maximum visibility of this study. To this end, results of the study will be published in open-  
25 access scientific journals with peer review. At least one publication of the main results and  
26 others with the secondary results are planned. This will be complemented by the presentation  
27 of the results of the study at relevant scientific conferences and seminars, of national and  
28 international scope. Also, a doctoral thesis based on this project will be prepared. Appropriate  
29 dissemination will likewise be carried out through social networks and other media.  
30  
31

32 Patients or the public were not involved in the design, or conduct, or reporting, or  
33 dissemination plans of our research.  
34  
35  
36  
37  
38  
39  
40  
41  
42  
43  
44  
45  
46  
47  
48  
49  
50  
51  
52  
53  
54  
55  
56  
57  
58  
59  
60

BMJ Open

## DISCUSSION

In recent years, there has been an increase in attention to gut microbiota richness and complexity. The detailed evaluation on the biochemical role of gut microbiome unveils its contribution to local and systemic inflammation and to the development of metabolic diseases, by both diet dependent and independent mechanisms.<sup>21-23</sup>

A relation between microbiota and arterial stiffness, an early marker of vascular lesion, is expected.<sup>48</sup> A recent study from London found an inverse association between gut microbiome diversity and arterial stiffness, in women.<sup>49</sup> Another study, from Moscow, reported a relation between metabolic dysfunctions, gut microbiota low diversity and increased representation of opportunistic pathogens.<sup>50</sup>

We propose to analyze microbiota in patients with documented arterial stiffness. We believe that results from this study will provide novel data that will contribute to the understanding of microbiota role in the development of cardiovascular diseases. That knowledge may help to develop non-pharmacological approaches and strategies to prevent CVD, through lifestyle modification.

## Acknowledgments

The authors are grateful to all MIVAS group investigators: Luis García-Ortiz, Pedro Guimarães-Cunha, Rita Salvado, Isabel Vila, Manuel A Gomez-Marcos, Carlos Martínez-Salgado, Jesús M Hernandez-Rivas, Rogelio Gonzalez-Sarmiento, Jesus M<sup>a</sup> Hernandez-Sanchez, Rocio Benito, Sandra Santos-Minguez, Emiliano Rodriguez-Sanchez, Maria C Patino-Alonso, Jose A Maderuelo-Fernandez, José I Recio-Rodríguez, Jesús González-Sánchez, Susana Gonzalez Sanchez, Cristina Agudo-Conde, Cristina Lugones-Sanchez, Rosario Alonso-Domínguez, Carmela Rodriguez-Martín, Ángela de Cabo-Laso, Benigna Sánchez-Salgado, Natalia Sanchez-Aguadero, Sara Mora-Simón, Olaya Tamayo-Morales and M<sup>a</sup> Pilar Martín-Gonzalez on behalf of the Iberian network on arterial structure, central hemodynamics and neurocognition.

We would like to especially thank Dr Alex Mira for his advice and contribution to the analysis of microbiota.

We also want to thank the patient advisers who will collaborate with the study investigators disinterestedly.



BMJ Open

1  
2  
3 **Author Contributions** LGO, PGC and RS contributed to the conception and design of the study.  
4 RS and LGO prepared the manuscript of the study protocol. CLS, CAC, ACL, MAGM, ERS,SS, RB  
5 and JMHS contributed to the development of the study protocol. LGO and JMHR provided  
6 assistance with statistical methodology and knowledge. LGO, PGC, JMHR, MAGM and ERS  
7 provided a critical review of the manuscript. All authors have read and accepted the final  
8 version of the protocol.  
9  
10

11 **Funding** The project has been funded by the Carlos III Health Institute (Spain) through the  
12 Network of preventive activities and health promotion (redIAPP, RD16/0007), co-financed  
13 with European funds for regional development (FEDER), and the Autonomous Government of  
14 Castilla y León (GRS 1820/B/18; GRS 1944/B/19 and intensification program). They played no  
15 role in the study design, analysis, reporting of results, or decision to submit the manuscript  
16 for publication.  
17  
18

19 **Competing interests** None declared.  
20  
21

22 **Ethics approval** Committee of ethics of research with medicines of the health area of  
23 Salamanca (Spain) in 14/12/2018 (cod. 2018-11-136) and the Ethics committee for health of  
24 Guimaraes (Portugal) in 15/10/2019 (ref: 67/2019).  
25  
26  
27  
28  
29  
30  
31  
32  
33  
34  
35  
36  
37  
38  
39  
40  
41  
42  
43  
44  
45  
46  
47  
48  
49  
50  
51  
52  
53  
54  
55  
56  
57  
58  
59  
60

## REFERENCES

1. Piepoli MF, Hoes AW, Agewall S, et al. 2016 European Guidelines on cardiovascular disease prevention in clinical practice The Sixth Joint Task Force of the European Society of Cardiology and Other Societies on Cardiovascular Disease Prevention in Clinical Practice (constituted by representative. *Eur Heart J* 2016;37:2315-81. doi: 10.1093/eurheartj/ehw106
2. Vlachopoulos C, Xaplanteris P, Aboyans V, et al. The role of vascular biomarkers for primary and secondary prevention. A position paper from the European Society of Cardiology Working Group on peripheral circulation: Endorsed by the Association for Research into Arterial Structure and Physiology (ARTERY. *Atherosclerosis* 2015;241:507-32. doi: 10.1016/j.atherosclerosis.2015.05.007
3. Vlachopoulos C, Aznaouridis K, Stefanadis C. Prediction of Cardiovascular Events and All-Cause Mortality With Arterial Stiffness. *Journal of the American College of Cardiology* 2010;55:1318-27. doi: 10.1016/j.jacc.2009.10.061
4. Vlachopoulos C, Aznaouridis K, Stefanadis C. Aortic Stiffness for Cardiovascular Risk Prediction. *Journal of the American College of Cardiology* 2014;63:647-49. doi: 10.1016/j.jacc.2013.10.040
5. Laurent S, Marais L, Boutouyrie P. The Noninvasive Assessment of Vascular Aging. *Canadian Journal of Cardiology* 2016;32:669-79. doi: 10.1016/j.cjca.2016.01.039
6. Collaboration RVfAS. Determinants of pulse wave velocity in healthy people and in the presence of cardiovascular risk factors: 'establishing normal and reference values'. *Eur Heart J* 2010;31:2338-50. doi: 10.1093/eurheartj/ehq165
7. Shirai K, Hiruta N, Song M, et al. Cardio-ankle vascular index (CAVI) as a novel indicator of arterial stiffness: theory, evidence and perspectives. *J Atheroscler Thromb* 2011;18(11):924-38. doi: 10.5551/jat.7716 [published Online First: 2011/06/02]
8. Munakata M. Brachial-ankle pulse wave velocity in the measurement of arterial stiffness: recent evidence and clinical applications. *Curr Hypertens Rev* 2014;10(1):49-57. doi: 10.2174/15734021100114111160957 [published Online First: 2014/11/14]
9. Kashtanova D, Tkacheva O, Popenko A, et al. Gut microbiota and vascular biomarkers in patients without clinical cardiovascular diseases. *Artery Research* 2017;18:41-48. doi: 10.1016/j.artres.2017.02.007
10. Marques FZ, Mackay CR, Kaye DM. Beyond gut feelings: how the gut microbiota regulates blood pressure. *Nature Reviews Cardiology* 2017 doi: 10.1038/nrcardio.2017.120
11. Boulangé CL, Neves AL, Chilloux J, et al. Impact of the gut microbiota on inflammation, obesity, and metabolic disease. *Genome Medicine* 2016;8:42. doi: 10.1186/s13073-016-0303-2
12. Blandino G, Inturri R, Lazzara F, et al. Impact of gut microbiota on diabetes mellitus. *Diabetes and Metabolism: Elsevier Masson*, 2016:303-15.
13. Suez J, Korem T, Zeevi D, et al. Artificial sweeteners induce glucose intolerance by altering the gut microbiota. *Nature* 2014;514:181-6. doi: 10.1038/nature13793
14. Chassaing B, Koren O, Goodrich JK, et al. Dietary emulsifiers impact the mouse gut microbiota promoting colitis and metabolic syndrome. *Nature* 2015;519:92-6. doi: 10.1038/nature14232
15. Schnorr SL, Candela M, Rampelli S, et al. Gut microbiome of the Hadza hunter-gatherers. *Nature Communications* 2014;5:3654. doi: 10.1038/ncomms4654
16. Hung S-C, Yang T-M, Tarng D-C. SP260HIGH SALT DIET ALTERS GUT MICROBIOTA LEADING TO INFLAMMATION AND PROGRESSION OF CKD. *Nephrology Dialysis Transplantation* 2017;32:iii194-iii94. doi: 10.1093/ndt/gfx145.SP260
17. Wu H, Tremaroli V, Bäckhed F. Linking Microbiota to Human Diseases: A Systems Biology Perspective. *Trends in endocrinology and metabolism: TEM* 2015;26:758-70. doi: 10.1016/j.tem.2015.09.011
18. David LA, Maurice CF, Carmody RN, et al. Diet rapidly and reproducibly alters the human gut microbiome. *Nature* 2013;505:559-63. doi: 10.1038/nature12820
19. Wu GD, Chen J, Hoffmann C, et al. Linking Long-Term Dietary Patterns with Gut Microbial Enterotypes. *Science* 2011;334:105-08. doi: 10.1126/science.1208344
20. Hall AB, Tolonen AC, Xavier RJ. Human genetic variation and the gut microbiome in disease. *Nature Reviews Genetics* 2017;18:690-99. doi: 10.1038/nrg.2017.63
21. Yiu JHC, Dorweiler B, Woo CW. Interaction between gut microbiota and toll-like receptor: from immunity to metabolism. *Journal of Molecular Medicine* 2017;95:13-20. doi: 10.1007/s00109-016-1474-4
22. Cox AJ, West NP, Cripps AW. Obesity, inflammation, and the gut microbiota. *The Lancet Diabetes & Endocrinology* 2015;3:207-15. doi: 10.1016/S2213-8587(14)70134-2

23. Qi J, You T, Li J, et al. Circulating trimethylamine N-oxide and the risk of cardiovascular diseases: a systematic review and meta-analysis of 11 prospective cohort studies. *Journal of Cellular and Molecular Medicine* 2017 doi: 10.1111/jcmm.13307
24. Tang WHW, Wang Z, Levison BS, et al. Intestinal microbial metabolism of phosphatidylcholine and cardiovascular risk. *The New England journal of medicine* 2013;368:1575-84. doi: 10.1056/NEJMoa1109400
25. Cho CE, Taesuwan S, Malysheva OV, et al. Trimethylamine- *N*-oxide (TMAO) response to animal source foods varies among healthy young men and is influenced by their gut microbiota composition: A randomized controlled trial. *Molecular Nutrition & Food Research* 2017;61:1600324. doi: 10.1002/mnfr.201600324
26. Gomez-Marcos MA, Martinez-Salgado C, Gonzalez-Sarmiento R, et al. Association between different risk factors and vascular accelerated ageing (EVA study): study protocol for a cross-sectional, descriptive observational study. *BMJ Open* 2016;6(6):e011031. doi: 10.1136/bmjopen-2016-011031 [published Online First: 2016/06/09]
27. Cunha PG, Cotter J, Oliveira P, et al. The Rationale/Design of the Guimarães/Vizela Study. *Journal of Investigative Medicine* 2014;62:813-20. doi: 10.2310/JIM.0000000000000069
28. Zanchetti A, Dominiczak A, Coca A, et al. 2018 ESC/ESH Guidelines for the management of arterial hypertension. *Eur Heart J* 2018;39(33):3021-104. doi: 10.1093/eurheartj/ehy339 %J European Heart Journal
29. Schroder H, Fito M, Estruch R, et al. A short screener is valid for assessing Mediterranean diet adherence among older Spanish men and women. *J Nutr* 2011;141(6):1140-5. doi: 10.3945/jn.110.135566 [published Online First: 2011/04/22]
30. Recio-Rodriguez JI, Gomez-Marcos MA, Agudo-Conde C, et al. EVIDENT 3 Study: A randomized, controlled clinical trial to reduce inactivity and caloric intake in sedentary and overweight or obese people using a smartphone application: Study protocol. *Medicine (Baltimore)* 2018;97(2):e9633. doi: 10.1097/md.0000000000009633 [published Online First: 2018/02/27]
31. Martin-Moreno JM, Boyle P, Gorgojo L, et al. Development and validation of a food frequency questionnaire in Spain. *Int J Epidemiol* 1993;22(3):512-9. doi: 10.1093/ije/22.3.512 [published Online First: 1993/06/01]
32. Pedro Moreira DS, Maria Daniel Vaz de Almeida. Validade relativa de um questionário de frequência alimentar através da comparação com um registo alimentar de quatro dias. *Acta Médica Portuguesa* 2003;16(6):412-20. doi: <http://dx.doi.org/10.20344/amp.1218>
33. Craig CL, Marshall AL, Sjostrom M, et al. International physical activity questionnaire: 12-country reliability and validity. *Med Sci Sports Exerc* 2003;35(8):1381-95. doi: 10.1249/01.mss.0000078924.61453.fb [published Online First: 2003/08/06]
34. Marshall AL, Miller YD, Burton NW, et al. Measuring total and domain-specific sitting: a study of reliability and validity. *Med Sci Sports Exerc* 2010;42(6):1094-102. doi: 10.1249/MSS.0b013e3181c5ec18 [published Online First: 2009/12/10]
35. Klindworth A, Pruesse E, Schweer T, et al. Evaluation of general 16S ribosomal RNA gene PCR primers for classical and next-generation sequencing-based diversity studies. *Nucleic Acids Res* 2013;41(1):e1. doi: 10.1093/nar/gks808 [published Online First: 2012/08/31]
36. Yang B, Wang Y, Qian PY. Sensitivity and correlation of hypervariable regions in 16S rRNA genes in phylogenetic analysis. *BMC Bioinformatics* 2016;17:135. doi: 10.1186/s12859-016-0992-y [published Online First: 2016/03/24]
37. Gohl DM, MacLean A, Hauge A, et al. An optimized protocol for high-throughput amplicon-based microbiome profiling. *Protocol Exchange* 2016 doi: <https://doi.org/10.1038/protex.2016.030>
38. Edgar RC, Haas BJ, Clemente JC, et al. UCHIME improves sensitivity and speed of chimera detection. *Bioinformatics* 2011;27(16):2194-200. doi: 10.1093/bioinformatics/btr381 [published Online First: 2011/06/28]
39. Collaboration TRVfAS. Determinants of pulse wave velocity in healthy people and in the presence of cardiovascular risk factors: 'establishing normal and reference values'. *European Heart Journal* 2010;31(19):2338-50. doi: 10.1093/eurheartj/ehq165
40. Shirai K, Utino J, Otsuka K, et al. A novel blood pressure-independent arterial wall stiffness parameter; cardio-ankle vascular index (CAVI). *J Atheroscler Thromb* 2006;13(2):101-7. [published Online First: 2006/05/31]
41. Yamashina A, Tomiyama H, Takeda K, et al. Validity, reproducibility, and clinical significance of noninvasive brachial-ankle pulse wave velocity measurement. *Hypertens Res* 2002;25(3):359-64. [published Online First: 2002/07/24]

- 1  
2  
3 42. Kawai T, Ohishi M, Onishi M, et al. Cut-off value of brachial-ankle pulse wave velocity to predict  
4 cardiovascular disease in hypertensive patients: a cohort study. *J Atheroscler Thromb* 2013;20(4):391-400. doi:  
5 10.5551/jat.15040 [published Online First: 2012/12/28]  
6 43. Garcia-Ortiz L, Recio-Rodriguez JI, Agudo-Conde C, et al. Noninvasive validation of central and peripheral  
7 augmentation index estimated by a novel wrist-worn tonometer. *J Hypertens* 2018;36(11):2204-14. doi:  
8 10.1097/hjh.0000000000001806 [published Online First: 2018/05/31]  
9 44. Levey AS, Stevens LA, Schmid CH, et al. A new equation to estimate glomerular filtration rate. *Annals of*  
10 *internal medicine* 2009;150:604-12.  
11 45. Delgado C, Araneda A, Behrens MI. Validation of the Spanish-language version of the Montreal Cognitive  
12 Assessment test in adults older than 60 years. *Neurologia* 2019;34(6):376-85. doi: 10.1016/j.nrl.2017.01.013  
13 [published Online First: 2017/04/04]  
14 46. Freitas S, Simoes MR, Alves L, et al. Montreal Cognitive Assessment (MoCA): validation study for vascular  
15 dementia. *J Int Neuropsychol Soc* 2012;18(6):1031-40. doi: 10.1017/s135561771200077x [published Online  
16 First: 2012/06/09]  
17 47. Harris PA, Taylor R, Thielke R, et al. Research electronic data capture (REDCap)--a metadata-driven  
18 methodology and workflow process for providing translational research informatics support. *J Biomed Inform*  
19 2009;42(2):377-81. doi: 10.1016/j.jbi.2008.08.010 [published Online First: 2008/10/22]  
20 48. van den Munckhof ICL, Kurilshikov A, Ter Horst R, et al. Role of gut microbiota in chronic low-grade  
21 inflammation as potential driver for atherosclerotic cardiovascular disease: a systematic review of human  
22 studies. *Obes Rev* 2018;19(12):1719-34. doi: 10.1111/obr.12750 [published Online First: 2018/08/26]  
23 49. Menni C, Lin C, Cecelja M, et al. Gut microbial diversity is associated with lower arterial stiffness in women.  
24 *Eur Heart J* 2018;39(25):2390-97. doi: 10.1093/eurheartj/ehy226  
25 50. Kashtanova DA, Tkacheva ON, Doudinskaya EN, et al. Gut Microbiota in Patients with Different Metabolic  
26 Statuses: Moscow Study. *Microorganisms* 2018;6(4) doi: 10.3390/microorganisms6040098 [published Online  
27 First: 2018/09/28]  
28  
29  
30

### Figure legends

31  
32 Figure 1: Study Flow chart. **cf-PWV** - carotid-femoral pulse wave velocity; **CAVI** - cardio-ankle  
33 vascular Index; **ba PWV** - brachial-ankle pulse wave velocity.  
34  
35  
36  
37  
38  
39  
40  
41  
42  
43  
44  
45  
46  
47  
48  
49  
50  
51  
52  
53  
54  
55  
56  
57  
58  
59  
60

1  
2  
3  
4  
5  
6  
7  
8  
9  
10  
11  
12  
13  
14  
15  
16  
17  
18  
19  
20  
21  
22  
23  
24  
25  
26  
27  
28  
29  
30  
31  
32  
33  
34  
35  
36  
37  
38  
39  
40  
41  
42  
43  
44  
45  
46  
47  
48  
49  
50  
51  
52  
53  
54  
55  
56  
57  
58  
59  
60

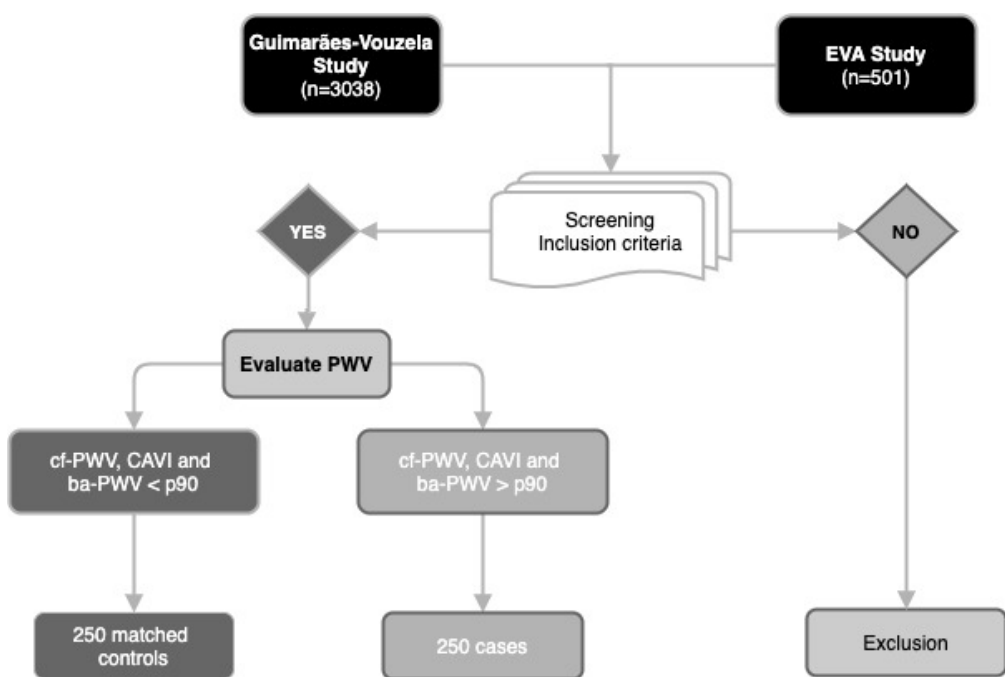

Figure 1: Study Flow chart. cf-PWV - carotid-femoral pulse wave velocity; CAVI - cardio-ankle vascular Index; ba PWV - brachial ankle pulse wave velocity

212x141mm (72 x 72 DPI)

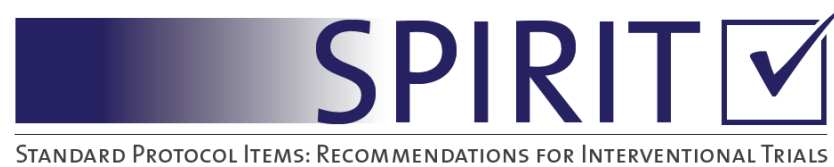

SPIRIT 2013 Checklist: Recommended items to address in a clinical trial protocol and related documents\*

| Section/item                      | Item No | Description                                                                                                                                                                                                                                                                              | Addressed on page number |
|-----------------------------------|---------|------------------------------------------------------------------------------------------------------------------------------------------------------------------------------------------------------------------------------------------------------------------------------------------|--------------------------|
| <b>Administrative information</b> |         |                                                                                                                                                                                                                                                                                          |                          |
| Title                             | 1       | Descriptive title identifying the study design, population, interventions, and, if applicable, trial acronym                                                                                                                                                                             | ___ 1 ___                |
| Trial registration                | 2a      | Trial identifier and registry name. If not yet registered, name of intended registry                                                                                                                                                                                                     | ___ 2 ___                |
|                                   | 2b      | All items from the World Health Organization Trial Registration Data Set                                                                                                                                                                                                                 | ___ 2 ___                |
| Protocol version                  | 3       | Date and version identifier                                                                                                                                                                                                                                                              | ___ 2 ___                |
| Funding                           | 4       | Sources and types of financial, material, and other support                                                                                                                                                                                                                              | ___ 21 ___               |
| Roles and responsibilities        | 5a      | Names, affiliations, and roles of protocol contributors                                                                                                                                                                                                                                  | ___ 21 ___               |
|                                   | 5b      | Name and contact information for the trial sponsor                                                                                                                                                                                                                                       | ___ 1+21 ___             |
|                                   | 5c      | Role of study sponsor and funders, if any, in study design; collection, management, analysis, and interpretation of data; writing of the report; and the decision to submit the report for publication, including whether they will have ultimate authority over any of these activities | ___ n/a ___              |
|                                   | 5d      | Composition, roles, and responsibilities of the coordinating centre, steering committee, endpoint adjudication committee, data management team, and other individuals or groups overseeing the trial, if applicable (see Item 21a for data monitoring committee)                         | ___ n/a ___              |

|    |                                                           |     |                                                                                                                                                                                                                                                                                                                                                                                |                 |
|----|-----------------------------------------------------------|-----|--------------------------------------------------------------------------------------------------------------------------------------------------------------------------------------------------------------------------------------------------------------------------------------------------------------------------------------------------------------------------------|-----------------|
| 1  | <b>Introduction</b>                                       |     |                                                                                                                                                                                                                                                                                                                                                                                |                 |
| 2  |                                                           |     |                                                                                                                                                                                                                                                                                                                                                                                |                 |
| 3  | Background and rationale                                  | 6a  | Description of research question and justification for undertaking the trial, including summary of relevant studies (published and unpublished) examining benefits and harms for each intervention                                                                                                                                                                             | ___ 4-6 ___     |
| 4  |                                                           |     |                                                                                                                                                                                                                                                                                                                                                                                |                 |
| 5  |                                                           |     |                                                                                                                                                                                                                                                                                                                                                                                |                 |
| 6  |                                                           | 6b  | Explanation for choice of comparators                                                                                                                                                                                                                                                                                                                                          | ___ 6 ___       |
| 7  |                                                           |     |                                                                                                                                                                                                                                                                                                                                                                                |                 |
| 8  | Objectives                                                | 7   | Specific objectives or hypotheses                                                                                                                                                                                                                                                                                                                                              | ___ 6+7 ___     |
| 9  |                                                           |     |                                                                                                                                                                                                                                                                                                                                                                                |                 |
| 10 | Trial design                                              | 8   | Description of trial design including type of trial (eg, parallel group, crossover, factorial, single group), allocation ratio, and framework (eg, superiority, equivalence, noninferiority, exploratory)                                                                                                                                                                      | ___ 7+18 ___    |
| 11 |                                                           |     |                                                                                                                                                                                                                                                                                                                                                                                |                 |
| 12 |                                                           |     |                                                                                                                                                                                                                                                                                                                                                                                |                 |
| 13 |                                                           |     |                                                                                                                                                                                                                                                                                                                                                                                |                 |
| 14 | <b>Methods: Participants, interventions, and outcomes</b> |     |                                                                                                                                                                                                                                                                                                                                                                                |                 |
| 15 |                                                           |     |                                                                                                                                                                                                                                                                                                                                                                                |                 |
| 16 | Study setting                                             | 9   | Description of study settings (eg, community clinic, academic hospital) and list of countries where data will be collected. Reference to where list of study sites can be obtained                                                                                                                                                                                             | ___ 7 ___       |
| 17 |                                                           |     |                                                                                                                                                                                                                                                                                                                                                                                |                 |
| 18 |                                                           |     |                                                                                                                                                                                                                                                                                                                                                                                |                 |
| 19 | Eligibility criteria                                      | 10  | Inclusion and exclusion criteria for participants. If applicable, eligibility criteria for study centres and individuals who will perform the interventions (eg, surgeons, psychotherapists)                                                                                                                                                                                   | ___ 8 ___       |
| 20 |                                                           |     |                                                                                                                                                                                                                                                                                                                                                                                |                 |
| 21 |                                                           |     |                                                                                                                                                                                                                                                                                                                                                                                |                 |
| 22 | Interventions                                             | 11a | Interventions for each group with sufficient detail to allow replication, including how and when they will be administered                                                                                                                                                                                                                                                     | ___ n/a ___     |
| 23 |                                                           |     |                                                                                                                                                                                                                                                                                                                                                                                |                 |
| 24 |                                                           | 11b | Criteria for discontinuing or modifying allocated interventions for a given trial participant (eg, drug dose change in response to harms, participant request, or improving/worsening disease)                                                                                                                                                                                 | ___ n/a ___     |
| 25 |                                                           |     |                                                                                                                                                                                                                                                                                                                                                                                |                 |
| 26 |                                                           | 11c | Strategies to improve adherence to intervention protocols, and any procedures for monitoring adherence (eg, drug tablet return, laboratory tests)                                                                                                                                                                                                                              | ___ n/a ___     |
| 27 |                                                           |     |                                                                                                                                                                                                                                                                                                                                                                                |                 |
| 28 |                                                           | 11d | Relevant concomitant care and interventions that are permitted or prohibited during the trial                                                                                                                                                                                                                                                                                  | ___ n/a ___     |
| 29 |                                                           |     |                                                                                                                                                                                                                                                                                                                                                                                |                 |
| 30 | Outcomes                                                  | 12  | Primary, secondary, and other outcomes, including the specific measurement variable (eg, systolic blood pressure), analysis metric (eg, change from baseline, final value, time to event), method of aggregation (eg, median, proportion), and time point for each outcome. Explanation of the clinical relevance of chosen efficacy and harm outcomes is strongly recommended | ___ 8-18 ___    |
| 31 |                                                           |     |                                                                                                                                                                                                                                                                                                                                                                                |                 |
| 32 |                                                           |     |                                                                                                                                                                                                                                                                                                                                                                                |                 |
| 33 |                                                           |     |                                                                                                                                                                                                                                                                                                                                                                                |                 |
| 34 | Participant timeline                                      | 13  | Time schedule of enrolment, interventions (including any run-ins and washouts), assessments, and visits for participants. A schematic diagram is highly recommended (see Figure)                                                                                                                                                                                               | ___ 8-16,18 ___ |
| 35 |                                                           |     |                                                                                                                                                                                                                                                                                                                                                                                |                 |
| 36 |                                                           |     |                                                                                                                                                                                                                                                                                                                                                                                |                 |
| 37 |                                                           |     |                                                                                                                                                                                                                                                                                                                                                                                |                 |
| 38 |                                                           |     |                                                                                                                                                                                                                                                                                                                                                                                |                 |
| 39 |                                                           |     |                                                                                                                                                                                                                                                                                                                                                                                |                 |
| 40 |                                                           |     |                                                                                                                                                                                                                                                                                                                                                                                |                 |
| 41 |                                                           |     |                                                                                                                                                                                                                                                                                                                                                                                |                 |
| 42 |                                                           |     |                                                                                                                                                                                                                                                                                                                                                                                |                 |
| 43 |                                                           |     |                                                                                                                                                                                                                                                                                                                                                                                |                 |
| 44 |                                                           |     |                                                                                                                                                                                                                                                                                                                                                                                |                 |
| 45 |                                                           |     |                                                                                                                                                                                                                                                                                                                                                                                |                 |
| 46 |                                                           |     |                                                                                                                                                                                                                                                                                                                                                                                |                 |

|   |             |    |                                                                                                                                                                                       |               |
|---|-------------|----|---------------------------------------------------------------------------------------------------------------------------------------------------------------------------------------|---------------|
| 1 | Sample size | 14 | Estimated number of participants needed to achieve study objectives and how it was determined, including clinical and statistical assumptions supporting any sample size calculations | _____8_____   |
| 2 |             |    |                                                                                                                                                                                       |               |
| 3 |             |    |                                                                                                                                                                                       |               |
| 4 | Recruitment | 15 | Strategies for achieving adequate participant enrolment to reach target sample size                                                                                                   | _____n/a_____ |
| 5 |             |    |                                                                                                                                                                                       |               |

### 7 **Methods: Assignment of interventions (for controlled trials)**

#### 8 Allocation:

|    |                                  |     |                                                                                                                                                                                                                                                                                                                                                          |               |
|----|----------------------------------|-----|----------------------------------------------------------------------------------------------------------------------------------------------------------------------------------------------------------------------------------------------------------------------------------------------------------------------------------------------------------|---------------|
| 9  |                                  |     |                                                                                                                                                                                                                                                                                                                                                          |               |
| 10 |                                  |     |                                                                                                                                                                                                                                                                                                                                                          |               |
| 11 | Sequence generation              | 16a | Method of generating the allocation sequence (eg, computer-generated random numbers), and list of any factors for stratification. To reduce predictability of a random sequence, details of any planned restriction (eg, blocking) should be provided in a separate document that is unavailable to those who enrol participants or assign interventions | _____n/a_____ |
| 12 |                                  |     |                                                                                                                                                                                                                                                                                                                                                          |               |
| 13 |                                  |     |                                                                                                                                                                                                                                                                                                                                                          |               |
| 14 |                                  |     |                                                                                                                                                                                                                                                                                                                                                          |               |
| 15 |                                  |     |                                                                                                                                                                                                                                                                                                                                                          |               |
| 16 | Allocation concealment mechanism | 16b | Mechanism of implementing the allocation sequence (eg, central telephone; sequentially numbered, opaque, sealed envelopes), describing any steps to conceal the sequence until interventions are assigned                                                                                                                                                | _____n/a_____ |
| 17 |                                  |     |                                                                                                                                                                                                                                                                                                                                                          |               |
| 18 |                                  |     |                                                                                                                                                                                                                                                                                                                                                          |               |
| 19 |                                  |     |                                                                                                                                                                                                                                                                                                                                                          |               |
| 20 |                                  |     |                                                                                                                                                                                                                                                                                                                                                          |               |
| 21 | Implementation                   | 16c | Who will generate the allocation sequence, who will enrol participants, and who will assign participants to interventions                                                                                                                                                                                                                                | _____n/a_____ |
| 22 |                                  |     |                                                                                                                                                                                                                                                                                                                                                          |               |
| 23 |                                  |     |                                                                                                                                                                                                                                                                                                                                                          |               |
| 24 | Blinding (masking)               | 17a | Who will be blinded after assignment to interventions (eg, trial participants, care providers, outcome assessors, data analysts), and how                                                                                                                                                                                                                | _____n/a_____ |
| 25 |                                  |     |                                                                                                                                                                                                                                                                                                                                                          |               |
| 26 |                                  |     |                                                                                                                                                                                                                                                                                                                                                          |               |
| 27 |                                  | 17b | If blinded, circumstances under which unblinding is permissible, and procedure for revealing a participant's allocated intervention during the trial                                                                                                                                                                                                     | _____n/a_____ |
| 28 |                                  |     |                                                                                                                                                                                                                                                                                                                                                          |               |
| 29 |                                  |     |                                                                                                                                                                                                                                                                                                                                                          |               |
| 30 |                                  |     |                                                                                                                                                                                                                                                                                                                                                          |               |

### 31 **Methods: Data collection, management, and analysis**

|    |                         |     |                                                                                                                                                                                                                                                                                                                                                                                                              |                |
|----|-------------------------|-----|--------------------------------------------------------------------------------------------------------------------------------------------------------------------------------------------------------------------------------------------------------------------------------------------------------------------------------------------------------------------------------------------------------------|----------------|
| 32 |                         |     |                                                                                                                                                                                                                                                                                                                                                                                                              |                |
| 33 | Data collection methods | 18a | Plans for assessment and collection of outcome, baseline, and other trial data, including any related processes to promote data quality (eg, duplicate measurements, training of assessors) and a description of study instruments (eg, questionnaires, laboratory tests) along with their reliability and validity, if known. Reference to where data collection forms can be found, if not in the protocol | _____8-16_____ |
| 34 |                         |     |                                                                                                                                                                                                                                                                                                                                                                                                              |                |
| 35 |                         |     |                                                                                                                                                                                                                                                                                                                                                                                                              |                |
| 36 |                         |     |                                                                                                                                                                                                                                                                                                                                                                                                              |                |
| 37 |                         |     |                                                                                                                                                                                                                                                                                                                                                                                                              |                |
| 38 |                         |     |                                                                                                                                                                                                                                                                                                                                                                                                              |                |
| 39 |                         | 18b | Plans to promote participant retention and complete follow-up, including list of any outcome data to be collected for participants who discontinue or deviate from intervention protocols                                                                                                                                                                                                                    | _____n/a_____  |
| 40 |                         |     |                                                                                                                                                                                                                                                                                                                                                                                                              |                |
| 41 |                         |     |                                                                                                                                                                                                                                                                                                                                                                                                              |                |
| 42 |                         |     |                                                                                                                                                                                                                                                                                                                                                                                                              |                |



|    |                                 |     |                                                                                                                                                                                                                                                                                                                                       |               |
|----|---------------------------------|-----|---------------------------------------------------------------------------------------------------------------------------------------------------------------------------------------------------------------------------------------------------------------------------------------------------------------------------------------|---------------|
| 1  | Data management                 | 19  | Plans for data entry, coding, security, and storage, including any related processes to promote data quality (eg, double data entry; range checks for data values). Reference to where details of data management procedures can be found, if not in the protocol                                                                     | _____8_____   |
| 2  |                                 |     |                                                                                                                                                                                                                                                                                                                                       |               |
| 3  |                                 |     |                                                                                                                                                                                                                                                                                                                                       |               |
| 4  |                                 |     |                                                                                                                                                                                                                                                                                                                                       |               |
| 5  | Statistical methods             | 20a | Statistical methods for analysing primary and secondary outcomes. Reference to where other details of the statistical analysis plan can be found, if not in the protocol                                                                                                                                                              | ____16+17____ |
| 6  |                                 |     |                                                                                                                                                                                                                                                                                                                                       |               |
| 7  |                                 |     |                                                                                                                                                                                                                                                                                                                                       |               |
| 8  |                                 | 20b | Methods for any additional analyses (eg, subgroup and adjusted analyses)                                                                                                                                                                                                                                                              | ____16-17____ |
| 9  |                                 |     |                                                                                                                                                                                                                                                                                                                                       |               |
| 10 |                                 | 20c | Definition of analysis population relating to protocol non-adherence (eg, as randomised analysis), and any statistical methods to handle missing data (eg, multiple imputation)                                                                                                                                                       | ____n/a-____  |
| 11 |                                 |     |                                                                                                                                                                                                                                                                                                                                       |               |
| 12 |                                 |     |                                                                                                                                                                                                                                                                                                                                       |               |
| 13 |                                 |     |                                                                                                                                                                                                                                                                                                                                       |               |
| 14 | <b>Methods: Monitoring</b>      |     |                                                                                                                                                                                                                                                                                                                                       |               |
| 15 |                                 |     |                                                                                                                                                                                                                                                                                                                                       |               |
| 16 | Data monitoring                 | 21a | Composition of data monitoring committee (DMC); summary of its role and reporting structure; statement of whether it is independent from the sponsor and competing interests; and reference to where further details about its charter can be found, if not in the protocol. Alternatively, an explanation of why a DMC is not needed | ____18_____   |
| 17 |                                 |     |                                                                                                                                                                                                                                                                                                                                       |               |
| 18 |                                 |     |                                                                                                                                                                                                                                                                                                                                       |               |
| 19 |                                 |     |                                                                                                                                                                                                                                                                                                                                       |               |
| 20 |                                 |     |                                                                                                                                                                                                                                                                                                                                       |               |
| 21 |                                 |     |                                                                                                                                                                                                                                                                                                                                       |               |
| 22 |                                 | 21b | Description of any interim analyses and stopping guidelines, including who will have access to these interim results and make the final decision to terminate the trial                                                                                                                                                               | ____n/a_____  |
| 23 |                                 |     |                                                                                                                                                                                                                                                                                                                                       |               |
| 24 |                                 |     |                                                                                                                                                                                                                                                                                                                                       |               |
| 25 | Harms                           | 22  | Plans for collecting, assessing, reporting, and managing solicited and spontaneously reported adverse events and other unintended effects of trial interventions or trial conduct                                                                                                                                                     | ____n/a_____  |
| 26 |                                 |     |                                                                                                                                                                                                                                                                                                                                       |               |
| 27 |                                 |     |                                                                                                                                                                                                                                                                                                                                       |               |
| 28 | Auditing                        | 23  | Frequency and procedures for auditing trial conduct, if any, and whether the process will be independent from investigators and the sponsor                                                                                                                                                                                           | ____18_____   |
| 29 |                                 |     |                                                                                                                                                                                                                                                                                                                                       |               |
| 30 |                                 |     |                                                                                                                                                                                                                                                                                                                                       |               |
| 31 |                                 |     |                                                                                                                                                                                                                                                                                                                                       |               |
| 32 | <b>Ethics and dissemination</b> |     |                                                                                                                                                                                                                                                                                                                                       |               |
| 33 |                                 |     |                                                                                                                                                                                                                                                                                                                                       |               |
| 34 | Research ethics approval        | 24  | Plans for seeking research ethics committee/institutional review board (REC/IRB) approval                                                                                                                                                                                                                                             | ____18_____   |
| 35 |                                 |     |                                                                                                                                                                                                                                                                                                                                       |               |
| 36 |                                 |     |                                                                                                                                                                                                                                                                                                                                       |               |
| 37 | Protocol amendments             | 25  | Plans for communicating important protocol modifications (eg, changes to eligibility criteria, outcomes, analyses) to relevant parties (eg, investigators, REC/IRBs, trial participants, trial registries, journals, regulators)                                                                                                      | ____18_____   |
| 38 |                                 |     |                                                                                                                                                                                                                                                                                                                                       |               |
| 39 |                                 |     |                                                                                                                                                                                                                                                                                                                                       |               |
| 40 |                                 |     |                                                                                                                                                                                                                                                                                                                                       |               |
| 41 |                                 |     |                                                                                                                                                                                                                                                                                                                                       |               |
| 42 |                                 |     |                                                                                                                                                                                                                                                                                                                                       |               |

|    |                               |     |                                                                                                                                                                                                                                                                                     |                                |
|----|-------------------------------|-----|-------------------------------------------------------------------------------------------------------------------------------------------------------------------------------------------------------------------------------------------------------------------------------------|--------------------------------|
| 1  | Consent or assent             | 26a | Who will obtain informed consent or assent from potential trial participants or authorised surrogates, and how (see Item 32)                                                                                                                                                        | _____ 18 _____                 |
| 2  |                               |     |                                                                                                                                                                                                                                                                                     |                                |
| 3  |                               |     |                                                                                                                                                                                                                                                                                     |                                |
| 4  |                               | 26b | Additional consent provisions for collection and use of participant data and biological specimens in ancillary studies, if applicable                                                                                                                                               | _____ n/a _____                |
| 5  |                               |     |                                                                                                                                                                                                                                                                                     |                                |
| 6  |                               |     |                                                                                                                                                                                                                                                                                     |                                |
| 7  | Confidentiality               | 27  | How personal information about potential and enrolled participants will be collected, shared, and maintained in order to protect confidentiality before, during, and after the trial                                                                                                | _____ 18+19 _____              |
| 8  |                               |     |                                                                                                                                                                                                                                                                                     |                                |
| 9  |                               |     |                                                                                                                                                                                                                                                                                     |                                |
| 10 | Declaration of interests      | 28  | Financial and other competing interests for principal investigators for the overall trial and each study site                                                                                                                                                                       | _____ 21 _____                 |
| 11 |                               |     |                                                                                                                                                                                                                                                                                     |                                |
| 12 |                               |     |                                                                                                                                                                                                                                                                                     |                                |
| 13 | Access to data                | 29  | Statement of who will have access to the final trial dataset, and disclosure of contractual agreements that limit such access for investigators                                                                                                                                     | _____ 21 _____                 |
| 14 |                               |     |                                                                                                                                                                                                                                                                                     |                                |
| 15 |                               |     |                                                                                                                                                                                                                                                                                     |                                |
| 16 | Ancillary and post-trial care | 30  | Provisions, if any, for ancillary and post-trial care, and for compensation to those who suffer harm from trial participation                                                                                                                                                       | _____ n/a _____                |
| 17 |                               |     |                                                                                                                                                                                                                                                                                     |                                |
| 18 |                               |     |                                                                                                                                                                                                                                                                                     |                                |
| 19 |                               |     |                                                                                                                                                                                                                                                                                     |                                |
| 20 | Dissemination policy          | 31a | Plans for investigators and sponsor to communicate trial results to participants, healthcare professionals, the public, and other relevant groups (eg, via publication, reporting in results databases, or other data sharing arrangements), including any publication restrictions | _____ 19 _____                 |
| 21 |                               |     |                                                                                                                                                                                                                                                                                     |                                |
| 22 |                               |     |                                                                                                                                                                                                                                                                                     |                                |
| 23 |                               |     |                                                                                                                                                                                                                                                                                     |                                |
| 24 |                               | 31b | Authorship eligibility guidelines and any intended use of professional writers                                                                                                                                                                                                      | _____ n/a _____                |
| 25 |                               |     |                                                                                                                                                                                                                                                                                     |                                |
| 26 |                               | 31c | Plans, if any, for granting public access to the full protocol, participant-level dataset, and statistical code                                                                                                                                                                     | _____ n/a _____                |
| 27 |                               |     |                                                                                                                                                                                                                                                                                     |                                |
| 28 |                               |     |                                                                                                                                                                                                                                                                                     |                                |
| 29 | <b>Appendices</b>             |     |                                                                                                                                                                                                                                                                                     |                                |
| 30 |                               |     |                                                                                                                                                                                                                                                                                     |                                |
| 31 | Informed consent materials    | 32  | Model consent form and other related documentation given to participants and authorised surrogates                                                                                                                                                                                  | _____ <u>appendice 1</u> _____ |
| 32 |                               |     |                                                                                                                                                                                                                                                                                     |                                |
| 33 |                               |     |                                                                                                                                                                                                                                                                                     |                                |
| 34 | Biological specimens          | 33  | Plans for collection, laboratory evaluation, and storage of biological specimens for genetic or molecular analysis in the current trial and for future use in ancillary studies, if applicable                                                                                      | _____ _____                    |
| 35 |                               |     |                                                                                                                                                                                                                                                                                     |                                |
| 36 |                               |     |                                                                                                                                                                                                                                                                                     |                                |

\*It is strongly recommended that this checklist be read in conjunction with the SPIRIT 2013 Explanation & Elaboration for important clarification on the items. Amendments to the protocol should be tracked and dated. The SPIRIT checklist is copyrighted by the SPIRIT Group under the Creative Commons "[Attribution-NonCommercial-NoDerivs 3.0 Unported](https://creativecommons.org/licenses/by-nc-nd/3.0/)" license.
